1 **Dynamic Analysis of Circulating Tumor DNA to Predict the**  
2 **Prognosis and Monitor the Treatment Response of Patients**  
3 **with Metastatic Triple-negative Breast Cancer: a prospective**  
4 **study**

5  
6 Yajing Chi<sup>1,2</sup>, Mu Su<sup>3</sup>, Dongdong Zhou<sup>1</sup>, Fangchao Zheng<sup>1</sup>, Baoxuan Zhang<sup>1</sup>, Ling  
7 Qiang<sup>1</sup>, Guohua Ren<sup>1</sup>, Lihua Song<sup>1</sup>, Bing Bu<sup>1</sup>, Shu Fang<sup>1</sup>, Bo Yu<sup>3</sup>, Jinxing Zhou<sup>3</sup>,  
8 Jinming Yu<sup>4#</sup>, Huihui Li<sup>1#</sup>

9 1. Department of Breast Medical Oncology, Shandong Cancer Hospital and Institute, Shandong First Medical  
10 University and Shandong Academy of Medical Sciences, Jinan, Shandong Province, China.

11 2. School of Medicine, Nankai University, Tianjin, China

12 3. Department of Bioinformatics, Berry Oncology Corporation, Beijing, China.

13 4. Department of Radiation Oncology, Shandong Cancer Hospital and Institute, Shandong First Medical University  
14 and Shandong Academy of Medical Sciences, Jinan, Shandong Province, China.

15 #Corresponding author:

16 Huihui Li, Department of Breast Medical Oncology, Shandong Cancer Hospital and Institute, Shandong First  
17 Medical University and Shandong Academy of Medical Sciences, No.440, Jiyan Road, Huaiyin District, Jinan,  
18 Shandong Province, China, Zip: 250017, Tel: +86 15553103209, Email: [huihuili82@163.com](mailto:huihuili82@163.com).

19 Jinming Yu, Department of Radiation Oncology, Shandong Cancer Hospital and Institute, Shandong First Medical  
20 University and Shandong Academy of Medical Sciences, Jinan, 250017, Shandong Province, China. Email:  
21 [sdyujinming@163.com](mailto:sdyujinming@163.com).

22 **Abstract**

23 **Background:** Limited data are available on the application of circulating tumor DNA  
24 (ctDNA) in metastatic triple-negative breast cancer (mTNBC) patients. Here, we  
25 investigated the value of ctDNA for predicting the prognosis and monitoring the  
26 treatment response in mTNBC patients.

27 **Methods:** We prospectively enrolled 70 Chinese patients with mTNBC who had  
28 progressed after  $\leq 2$  lines of chemotherapy and collected blood samples to extract  
29 ctDNA for 457-gene targeted panel sequencing.

30 **Results:** Patients with ctDNA+, defined by 12 prognosis-relevant mutated genes, had  
31 a shorter progression-free survival (PFS) than ctDNA- patients (5.16 months vs. 9.05  
32 months,  $P = 0.001$ ) and ctDNA+ was independently associated with a shorter PFS (HR,  
33 95%CI: 2.67, 1.2–5.96;  $P = 0.016$ ) by multivariable analyses. Patients with a higher

34 **NOTE: This preprint reports new research that has not been certified by peer review and should not be used to guide clinical practice.**

35 (ctDNA%  $\geq 0.05$ ) had a significantly shorter PFS than patients with a lower MATH  
36 score (5.67 months vs. 11.27 months,  $P = 0.007$ ) and patients with a lower ctDNA%  
37 (5.45 months vs. 12.17 months,  $P < 0.001$ ), respectively. Positive correlations with  
38 treatment response were observed for MATH score ( $R = 0.24$ ,  $P = 0.014$ ) and ctDNA%  
39 ( $R = 0.3$ ,  $P = 0.002$ ), but not the CEA, CA125, or CA153. Moreover, patients who  
40 remained ctDNA+ during dynamic monitoring tended to have a shorter PFS than those  
41 who did not (3.90 months vs. 6.10 months,  $P = 0.135$ ).

42 **Conclusions:** ctDNA profiling provides insight into the mutational landscape of  
43 mTNBC and may reliably predict the prognosis and treatment response of mTNBC  
44 patients.

45 **Funding:** This work was supported by the National Natural Science Foundation of  
46 China (Grant No. 81902713), Natural Science Foundation of Shandong Province (Grant  
47 No. ZR2019LZL018), Breast Disease Research Fund of Shandong Provincial Medical  
48 Association (Grant No. YXH2020ZX066), the Start-up Fund of Shandong Cancer  
49 Hospital (Grant No. 2020-PYB10), Beijing Science and Technology Innovation Fund  
50 (Grant No. KC2021-ZZ-0010-1).

51 **Keywords:** Circulating tumor DNA; metastatic triple-negative breast cancer; next-  
52 generation sequencing; prognosis; treatment response

53

## 54 **Introduction**

55 Breast cancer is the most common malignant tumor and the leading cause of cancer-  
56 related deaths in women worldwide (Sung et al., 2021). Triple-negative breast cancer  
57 (TNBC) represents 15%–20% of all breast cancer cases and exhibits a more aggressive  
58 phenotype (with a poorer prognosis) than non-TNBC (Foulkes, Smith, & Reis-Filho,  
59 2010; X. Li et al., 2017; Malorni et al., 2012). Due to the absence of human epidermal  
60 growth factor receptor 2 (HER2), estrogen receptor (ER), or progesterone receptor (PR)  
61 expression, TNBC lacks effective targeted therapies and treatment regimens. Patients  
62 with mTNBC have fewer available treatment options and exhibit worse survival than  
63 early-stage TNBC patients. Furthermore, TNBC is a highly heterogeneous disease,

64 resulting in substantial differences in the tumorigenesis, treatment response, and disease  
65 progression among patients(Burstein et al., 2015; Jiang et al., 2019; Perou, 2011), which  
66 undoubtedly poses great challenges in prognostic prediction of the mTNBC and  
67 efficacy assessment for already limited treatment options. Unfortunately, reliable and  
68 tailored biomarkers to predict the prognosis and monitor the treatment response of  
69 patients with TNBC are yet to be established.

70 It has been a long-standing clinical management model to predict the prognosis of  
71 patients with mTNBC and guide treatment decision-making through imaging  
72 examination and mutational features obtained by tumor biopsy. Imaging usually only  
73 provides the external characterization of the tumor, but can not reveal tumor internal  
74 molecular characteristics. Given the heterogeneity of TNBC, it is not possible to obtain  
75 an accurate and comprehensive picture of the mutational landscape using tissue biopsies  
76 unless repeated multiple biopsies(Diaz & Bardelli, 2014), and most patients are  
77 refractory to repetitive punctures.

78 Compared with tissue biopsies, “liquid biopsies” collect and analyze tumor-derived  
79 substances, such as circulating tumor DNA (ctDNA), circulating tumor cells (CTCs),  
80 and exosomes (e.g., from the blood, cerebrospinal fluid, and urine) of cancer patients  
81 in a minimally invasive fashion(Alix-Panabières & Pantel, 2016; Palmirotta et al., 2018;  
82 Poulet, Massias, & Taly, 2019). It can be used for early diagnosis of tumor patients,  
83 predicting tumor recurrence and metastasis, and evaluating the characteristics and  
84 clonal evolution of tumor genomes. ctDNA is a specific fraction of cell-free DNA  
85 (cfDNA), which is present in the plasma of apoptotic and necrotic tumor cells(Swarup  
86 & Rajeswari, 2007). Owing to special biological origin and the potential for multiple  
87 repeat sampling, ctDNA is independent of tumor spatial and temporal heterogeneity,  
88 convey more valuable information than a conventional tumor biopsy and enable the  
89 dynamic monitoring of tumor burden and treatment response(Campos-Carrillo et al.,  
90 2020; Chae & Oh, 2019; Dawson et al., 2013; Gerratana et al., 2021). The value of  
91 ctDNA in the accurate prediction of drug resistance and clinical outcomes has also been  
92 noted(Asante, Calapre, Ziman, Meniawy, & Gray, 2020; Murtaza et al., 2013).

93 Several studies have demonstrated the prognostic and predictive value of ctDNA for

94 non-mTNBC during or after (neo)adjuvant therapy(Cavallone et al., 2020; H. Kim et  
95 al., 2021; Lin et al., 2021; Ortolan et al., 2021; Riva et al., 2017). Previously, researchers  
96 have also been relatively circumscribed concentrated on evaluating specific copy  
97 number variants (CNVs) or ctDNA-based single mutation or clonal evolution or the  
98 ctDNA level to predict the prognosis of mTNBC patients and the efficacy of specific  
99 treatment regimens(Barroso-Sousa et al., 2022; Chopra et al., 2020; Collier et al., 2021;  
100 Stover et al., 2018; Weber et al., 2021; Wongchenko et al., 2020). Even a study showed  
101 that the ctDNA level had no prognostic impact on survival of patients with  
102 mTNBC(Madic et al., 2015). A more comprehensive study of the mutational  
103 information and related markers embodied in ctDNA as well as a consensus on the  
104 predictive role of ctDNA in mTNBC are needed to apply ctDNA in clinical practice.

105 Hence, in this study, we investigated the mutational characteristics of ctDNA and  
106 ctDNA-related markers in mTNBC using targeted, capture-based, next-generation  
107 sequencing (NGS), which offers rapid identification and high coverage from a small  
108 blood sample. We aimed to dynamically and more comprehensively evaluate the value  
109 of ctDNA in predicting the prognosis and monitoring the treatment response of patients  
110 with mTNBC.

111

## 112 **Methods**

### 113 **Study design and sample collection**

114 Between 2018 and 2021, patients with mTNBC who had progressed after  $\leq 2$  lines of  
115 chemotherapy were prospectively enrolled. A 10 mL sample of peripheral blood was  
116 collected into an EDTA anticoagulant tube (STRECK Cell-Free DNA BCT<sup>®</sup>) from  
117 patients at different time points (i.e., before treatment, during treatment [treatment cycle  
118 3, day 1], and at progression). Within 2 hours of collection, blood samples were  
119 centrifuged at  $1,600 \times g$  for 10 min at 4 °C to obtain plasma, followed by secondary  
120 centrifugation at  $16,000 \times g$  for 10 min at 4 °C to obtained peripheral blood cells.  
121 Plasma and peripheral blood cells were stored at  $-80$  °C until the extraction of ctDNA  
122 and genomic DNA (gDNA). Paraffin-embedded primary or metastatic tumor tissues  
123 were collected before treatment and stored at room temperature for later use.

124

## 125 **DNA extraction and targeted capture-based NGS**

126 ctDNA was extracted from peripheral blood using the QIAamp Circulating Nucleic  
127 Acid Kit (Qiagen, Germany) while tumor DNA (tDNA) was extracted from the  
128 paraffin-embedded tumor tissues using the AllPrep DNA/RNA FFPE Kit (50) (Qiagen,  
129 Germany). Normal control gDNA was extracted from white blood cells using the  
130 DNeasy Kit (Qiagen, Germany) according to the manufacturer's instructions. The  
131 sequencing library was prepared from the ctDNA and tDNA samples using the KAPA  
132 DNA Library Preparation Kit (KAPA Biosystems, USA), while the gDNA sequencing  
133 library was constructed using the Illumina TruSeq DNA Library Preparation Kit  
134 (Illumina, USA). Library concentration was determined using real-time quantitative  
135 PCR and the KAPA Library Quantification Kit (KAPA Biosystems, USA). The library  
136 fragments were then size-selected using agarose gel electrophoresis. A targeted NGS  
137 panel of 457 genes (**Supplementary Table 1**), which are known to be frequently  
138 mutated in tumors, was designed to capture the target DNA fragments. Sequencing  
139 libraries were loaded onto a NovaSeq 6000 platform (Illumina, USA) with a 150-bp  
140 read length in paired-end mode.

141

## 142 **Sequencing data analysis**

143 Quality control of the raw sequencing data involved the use of FASTP to trim adapters  
144 and remove low-quality sequences(Chen, Zhou, Chen, & Gu, 2018). The clean reads  
145 were aligned against the Ensemble GRCh37/hg19 reference genome using BWA  
146 software(H. Li & Durbin, 2009). PCR duplications were processed using the gencore  
147 tool(Chen et al., 2019) and uniquely mapped reads were generated. The SAMtools suite  
148 was used to detect single-nucleotide variants (SNVs), insertions, and deletions(H. Li et  
149 al., 2009). CNVs were called using CONTRA(J. Li et al., 2012), with copy number >  
150 3 as the threshold of copy number gain and < 1 as the threshold of copy number loss.  
151 The maximal tumor somatic variant allelic frequency (max-VAF) describes the highest  
152 mutated frequency of ctDNA detected in the cfDNA(Maron et al., 2019). The  
153 calculation of the ctDNA fraction (ctDNA%) was based on the autosomal somatic allele

154 fractions. The mutant allele fraction (MAF) and ctDNA% are related as follows: MAF  
155 =  $(\text{ctDNA} \times 1)/[(1 - \text{ctDNA}) \times 2] + [\text{ctDNA} \times 1]$ ; thus,  $\text{ctDNA} = 2/(1/\text{MAF} +$   
156  $1)$ (Vandekerkhove et al., 2017). The mutant-allele tumor heterogeneity (MATH) score  
157 was calculated as the percentage ratio of the width (median absolute deviation [MAD]  
158 scaled by a constant factor, so that the expected MAD of a sample from a normal  
159 distribution equals the standard deviation) to the center of the distribution of MAFs  
160 among the tumor-specific mutated loci; thus,  $\text{MATH} = 100 \times \text{MAD}/\text{median}$ (Mroz &  
161 Rocco, 2013). Tumor mutational burden (TMB) was defined as the number of non-  
162 synonymous somatic mutations per megabase of genome examined(Chalmers et al.,  
163 2017).

164

## 165 **Statistical analysis**

166 The longest diameter (mm) of the tumor was measured by examining the radiological  
167 images. The response evaluation was carried out according to the Response Evaluation  
168 Criteria in Solid Tumors (RECIST) guidelines (version 1.1)(Eisenhauer et al., 2009).  
169 The Kaplan–Meier method was used for the survival analyses; median comparison was  
170 performed using the log-rank test and hazard ratios (HRs) from the Cox proportional  
171 hazards model. The optimal cut-off values for ctDNA%, MATH score, and TMB were  
172 determined by the R package “survminer”. Progression-free survival (PFS) was defined  
173 as the time interval from the initiation of the study to disease progression or death from  
174 any cause. Univariate Cox regression was carried out to analyze the mutations related  
175 to PFS; only genes mutated in > 5% of the patients were included in the analysis. The  
176 correlation between variables was analyzed using the Spearman correlation test and  
177 group comparisons were performed using the Wilcoxon rank-sum test. Statistical  
178 analysis and data visualization were conducted using R (version 4.0.1). The statistical  
179 significance was defined as bilateral  $P < 0.05$ .

180

## 181 **Results**

### 182 **Study cohort and sample information**

183 A total of 126 patients with mTNBC were included in the study. Fifty-six patients were  
184 excluded, comprising 21 patients who had previously been treated with more than two  
185 lines of chemotherapy, 16 patients who were treated with combination therapy (e.g.,  
186 chemotherapy with radiotherapy), 11 patients who were lost to follow-up, and 8 patients  
187 who failed to be evaluated for efficacy. Finally, 139 plasma samples (baseline samples  
188 from 70 patients and dynamic samples from 38/70 patients) from 70 patients and paired  
189 tumor tissues from 13 patients were collected and sequenced (**Figure 1A, B**). The  
190 patient baseline characteristics are shown in **Table 1**. The median age of all patients  
191 was 46 (26–75) years. Overall, 82.9% of patients were diagnosed with invasive ductal  
192 carcinoma and most of the patients developed visceral metastases at study entry. **Table**  
193 **2** shows that all patients received chemotherapy-based treatment with the most common  
194 chemotherapy drugs, such as gemcitabine, taxane, or platinum. Eleven patients were  
195 also treated with immunotherapy. The objective response rate was 38.6%, and 4, 23, 31,  
196 and 12 patients had complete response (CR), partial response (PR), stable disease (SD),  
197 and progressive disease (PD), respectively. The median PFS (mPFS) for all patients was  
198 6.15 months (**Supplementary Figure 1A**). There was no significant difference in PFS  
199 among different treatment lines or regimens (**Supplementary Figure 1B-H**), although  
200 patients treated in the first line had a trend towards improved survival compared with  
201 those treated in the second and third lines.

**Figure 1**

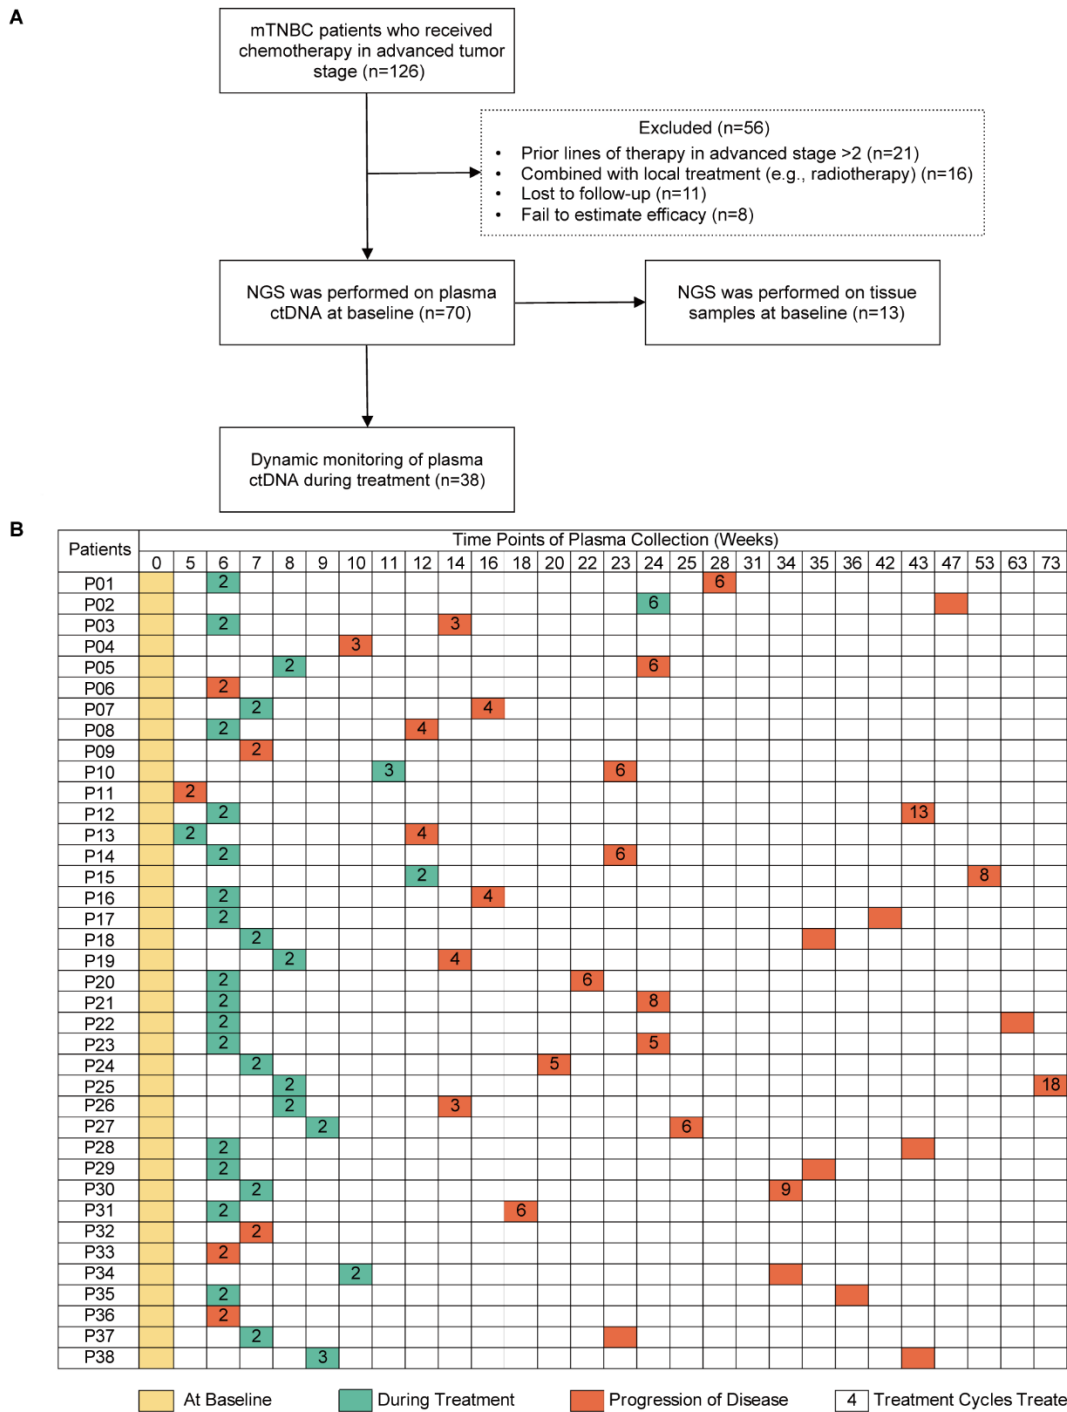

202

203

204

205

206

207

208

209

210

**Figure 1. Study design and sample collection.** (A) Study flowchart. After excluding 82 patients, a total of 70 patients with mTNBC were included in the final analysis. Baseline blood samples were collected from all patients (n = 70) and paired tumor tissues were collected from 13 patients for NGS. (B) Blood-sample-derived ctDNA was dynamically monitored at baseline (yellow), during treatment (green), and at progression (orange) for 38 of the 70 patients. ctDNA, circulating tumor DNA; mTNBC, metastatic triple-negative breast cancer; NGS, next-generation sequencing.



211 Table 1. The baseline characteristics in study population.

| Characteristics                                               | All patients-no. (%)<br>(n=70) | Dynamic monitoring patients-no. (%)<br>(n=38) |
|---------------------------------------------------------------|--------------------------------|-----------------------------------------------|
| <b>Age (yrs), median (range)</b>                              | 46 (26-75)                     | 47 (27-75)                                    |
| ≤50                                                           | 45 (64.3)                      | 26 (68.4)                                     |
| >50                                                           | 25 (35.7)                      | 12 (31.6)                                     |
| <b>Histopathologic diagnosis</b>                              |                                |                                               |
| Invasive ductal carcinoma                                     | 58 (82.9)                      | 29 (76.3)                                     |
| Other                                                         | 10 (14.3)                      | 7 (18.4)                                      |
| NA                                                            | 2 (2.9)                        | 2 (5.3)                                       |
| <b>Pathological grade</b>                                     |                                |                                               |
| I-II                                                          | 12 (17.1)                      | 10 (26.3)                                     |
| III                                                           | 39 (55.7)                      | 20 (52.6)                                     |
| NA                                                            | 19 (27.1)                      | 8 (21.1)                                      |
| <b>Disease stage at initial diagnosis</b>                     |                                |                                               |
| I                                                             | 7 (10.0)                       | 5 (13.2)                                      |
| II                                                            | 20 (28.6)                      | 10 (26.3)                                     |
| III                                                           | 33 (47.1)                      | 20 (52.6)                                     |
| IV                                                            | 7 (10.0)                       | 3 (7.9)                                       |
| NA                                                            | 3 (4.3)                        | 0                                             |
| <b>Disease-free interval (months)</b>                         |                                |                                               |
| ≤12 (including stage IV at initial diagnosis)                 | 23 (32.9)                      | 11 (28.9)                                     |
| >12                                                           | 47 (67.1)                      | 27 (71.1)                                     |
| <b>Sites of metastasis</b>                                    |                                |                                               |
| Visceral                                                      | 56 (80.0)                      | 33 (86.8)                                     |
| Non-visceral                                                  | 14 (20.0)                      | 5 (13.2)                                      |
| <b>Previous lines of chemotherapy during metastatic stage</b> |                                |                                               |
| 0                                                             | 46 (65.7)                      | 22 (57.9)                                     |
| 1                                                             | 19 (27.1)                      | 11 (28.9)                                     |
| 2                                                             | 5 (7.1)                        | 5 (13.2)                                      |

212

213

214

215

216

217

218

219

220

221

222

223

224 Table 2. The treatment characteristics and responses of patients.

| Treatment characteristics and responses | All patients-no. (%)<br>(n=70) | Dynamic monitoring patients-no. (%)<br>(n=38) |
|-----------------------------------------|--------------------------------|-----------------------------------------------|
| <b>Treatment regimens</b>               |                                |                                               |
| Contained gemcitabine + platinum        | 17 (24.3)                      | 10 (26.3)                                     |
| Contained taxane + platinum             | 16 (22.9)                      | 7 (18.4)                                      |
| Contained vinorelbine + platinum        | 4 (5.7)                        | 1 (2.6)                                       |
| Contained taxane but no platinum        | 22 (31.4)                      | 14 (36.8)                                     |
| Other                                   | 11 (15.7)                      | 6 (15.8)                                      |
| <b>Treatment modalities</b>             |                                |                                               |
| Immunotherapy + chemotherapy            | 11 (15.7)                      | 6 (15.8)                                      |
| Chemotherapy                            | 59 (84.3)                      | 32 (84.2)                                     |
| <b>Treatment responses</b>              |                                |                                               |
| CR                                      | 4 (5.7)                        | 4 (10.5)                                      |
| PR                                      | 23 (32.9)                      | 9 (23.7)                                      |
| SD                                      | 31 (44.3)                      | 18 (47.4)                                     |
| PD                                      | 12 (17.1)                      | 7 (18.4)                                      |

225

## 226 Mutation characteristics of patients with mTNBC

227 Plasma samples were obtained from 70 patients with mTNBC before treatment and  
 228 submitted for targeted NGS. In total, 203 mutated genes were identified using our panel  
 229 of 457 genes, including 301 missense mutations, 45 frame-shift indels, 16 in-frame  
 230 indels, 13 splice-site mutations, and 31 stop-gain mutations. The ten most frequently  
 231 mutated genes were *TP53* (69%), *PIK3CA* (24%), *ARID1A* (9%), *KMT2C* (9%), *CIC*  
 232 (7%), *KMT2D* (7%), *NOTCH4* (7%), *PBRM1* (7%), *PTEN* (7%), and *DNMT3A* (6%).  
 233 In addition, gene CNVs were detected in 351/457 genes, 296 of which showed copy  
 234 number gain (CNG), 38 showed copy number loss, and 17 had both gain and loss  
 235 mutations. The most prevalent genes with CNVs were *HLA-C* (50%), *HLA-A* (33%),  
 236 *HLA-B* (33%), *HLA-DRB1* (23%), *SPPL3* (21%), *BTG2* (19%), *C8orf34* (16%), *HLA-*  
 237 *DQA1* (16%), *HLA-E* (16%), and *LTBP1* (16%) (**Figure 2A**).

238 We also used NGS to evaluate the discrepancy and consistency of genomic  
 239 alterations in ctDNA samples and paired tumor tissues from 13 patients. The mutation  
 240 frequency in plasma ctDNA was significantly lower than that in the tumor tissues (0.049%  
 241  $\pm$  0.113% vs.  $0.168 \pm 0.173\%$ ,  $P < 0.001$ ) (**Supplementary Figure 2**). A total of 115  
 242 mutations in 85 genes were detected, which included 84 mutations in 63 genes from

243 plasma ctDNA and 81 mutations in 55 genes from tDNA. The number of ctDNA-  
 244 specific and tDNA-specific mutated genes was 37 in both cases. Hence, the  
 245 concordance rate between mutations in ctDNA and tDNA was 98.75% (**Figure 2B**).

**Figure2**

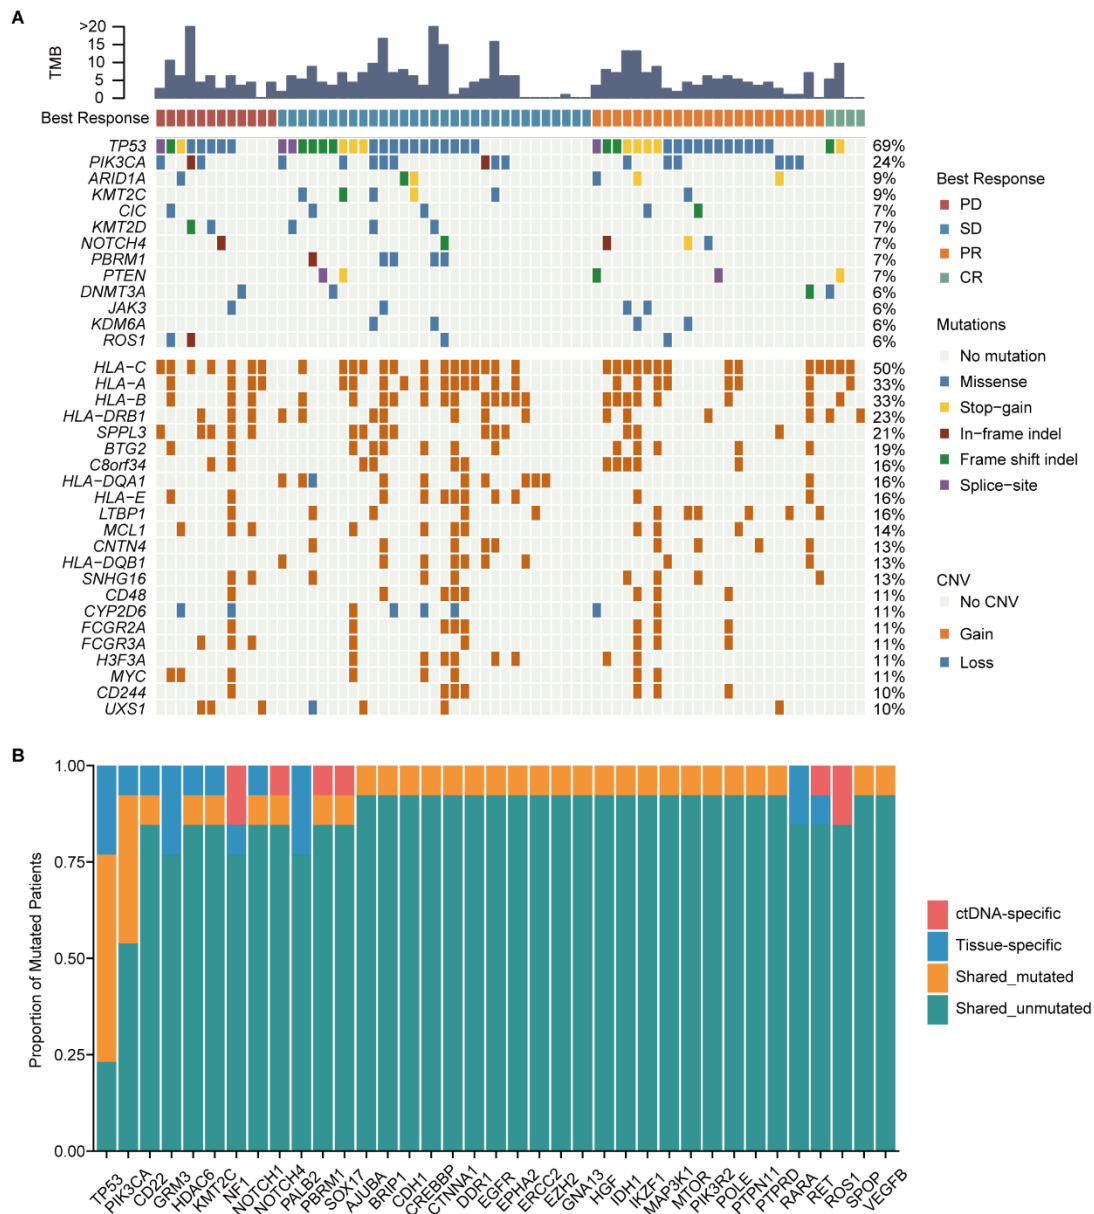

246

247 **Figure 2. Mutation characteristics of patients with mTNBC.** (A) The landscape of ctDNA mutations in 70 patients  
 248 with mTNBC prior to treatment initiation. The patients (n = 70) were divided into four groups (PD, SD, PR, and CR)  
 249 according to the best treatment response (from left to right). The top half of the figure shows SNVs with a mutation  
 250 frequency  $\geq 5\%$ , and the bottom half shows CNVs with a mutation frequency  $\geq 10\%$ ; the different colored rectangles  
 251 represent different types of variation. (B) Concordance between the genomic alterations in the blood-derived ctDNA  
 252 and the tissue-derived tDNA. The mutated genes detected in at least two samples are shown here. The concordance  
 253 rate = shared mutated genes / (all genes  $\times$  the number of comparisons)  $\times 100\%$  =  $(1 - [\text{ctDNA-specific and tissue-}$   
 254  $\text{specific mutated genes}] / [\text{all genes} \times \text{the number of comparisons}]) \times 100\%$  =  $(1 - [37 + 37] / [457 \times 13]) \times 100\%$  =  
 255 98.75%. CNVs, copy number variants; CR, complete response; ctDNA, circulating tumor DNA; tDNA, tumor DNA;

256 mTNBC, metastatic triple-negative breast cancer; PD, progressive disease; PR, partial response; SD, stable disease;  
257 SNVs, single-nucleotide variants.

258

### 259 **A ctDNA+/- status correlates with the treatment response and survival of** 260 **patients with mTNBC**

261 Univariate Cox regression analysis showed that 12 mutated genes, including *HLA-B*  
262 (HR, 95% confidence interval [CI]: 1.89, 1.08–3.32), *BTG2* (HR, 95% CI: 2.23, 1.15–  
263 4.31), *MCL1* (HR, 95% CI: 2.31, 1.1–4.84), *H3F3A* (HR, 95% CI: 2.36, 1.08–5.16),  
264 *MYC* (HR, 95% CI: 3.45, 1.58–7.54), *KMT2C* (HR, 95% CI: 2.75, 1.14–6.63), *KYAT3*  
265 (HR, 95% CI: 3.66, 1.48–9.04), *ARID4B* (HR, 95% CI: 4.04, 1.51–10.76), *CD22* (HR,  
266 95% CI: 3.66, 1.25–10.68), *TGFBI* (HR, 95% CI: 3.94, 1.35–11.56), *SGK1* (HR, 95%  
267 CI: 3.37, 1.15–9.82), and *RSPO2* (HR, 95% CI: 4.19, 1.42–12.34), indicated a higher  
268 risk for recurrence or progression in patients with mTNBC (**Figure 3A**). Moreover,  
269 these 12 mutated genes were significantly associated with worse survival  
270 (**Supplementary Figure 3**).

271 ctDNA was collected and evaluated at different time points and a plasma ctDNA  
272 sample with at least one of the 12 prognosis-relevant mutated genes was defined as  
273 ctDNA-positive (ctDNA+) (**Figure 3B**). The right half of **Figure 3B** shows that the  
274 mPFS in 70 patients with mTNBC was 6.15 months at a median follow-up of 19.13  
275 months. As shown, ctDNA+ patients tended to have a shorter survival duration and less  
276 clinical benefit. At baseline, the ctDNA+ rates were 25%, 43%, 55%, and 33% in  
277 patients with CR, PR, SD, and PD, respectively. By comparing the ctDNA+/- status at  
278 all the time points, we found that the amount of ctDNA+ positively correlated with a  
279 worse treatment response. The proportion of ctDNA+ at different time points was 46%  
280 (at baseline), 29% (during treatment), and 44% (at progress), while that in the different  
281 treatment response groups was 45% (PD), 39% (SD), 22% (PR), and 0% (CR) (**Figure**  
282 **3C**). Prior to treatment, the tumor size of the ctDNA+ group was significantly larger  
283 than that of the ctDNA- group ( $52.56 \pm 34.65$  mm vs.  $40.18 \pm 35.49$  mm,  $P < 0.001$ )  
284 (**Figure 3D**). We also found that patients who were ctDNA+ at baseline had a shorter  
285 PFS than those who were ctDNA- at baseline (5.16 months vs. 9.05 months,  $P = 0.001$ )

286 (Figure 3E). Multivariate Cox regression analysis, which included multiple clinical  
 287 factors and ctDNA status, showed that ctDNA+ was independently associated with a  
 288 shorter PFS (HR, 95% CI: 2.67, 1.2–5.96;  $P = 0.016$ ) (Table 3).

**Figure3**

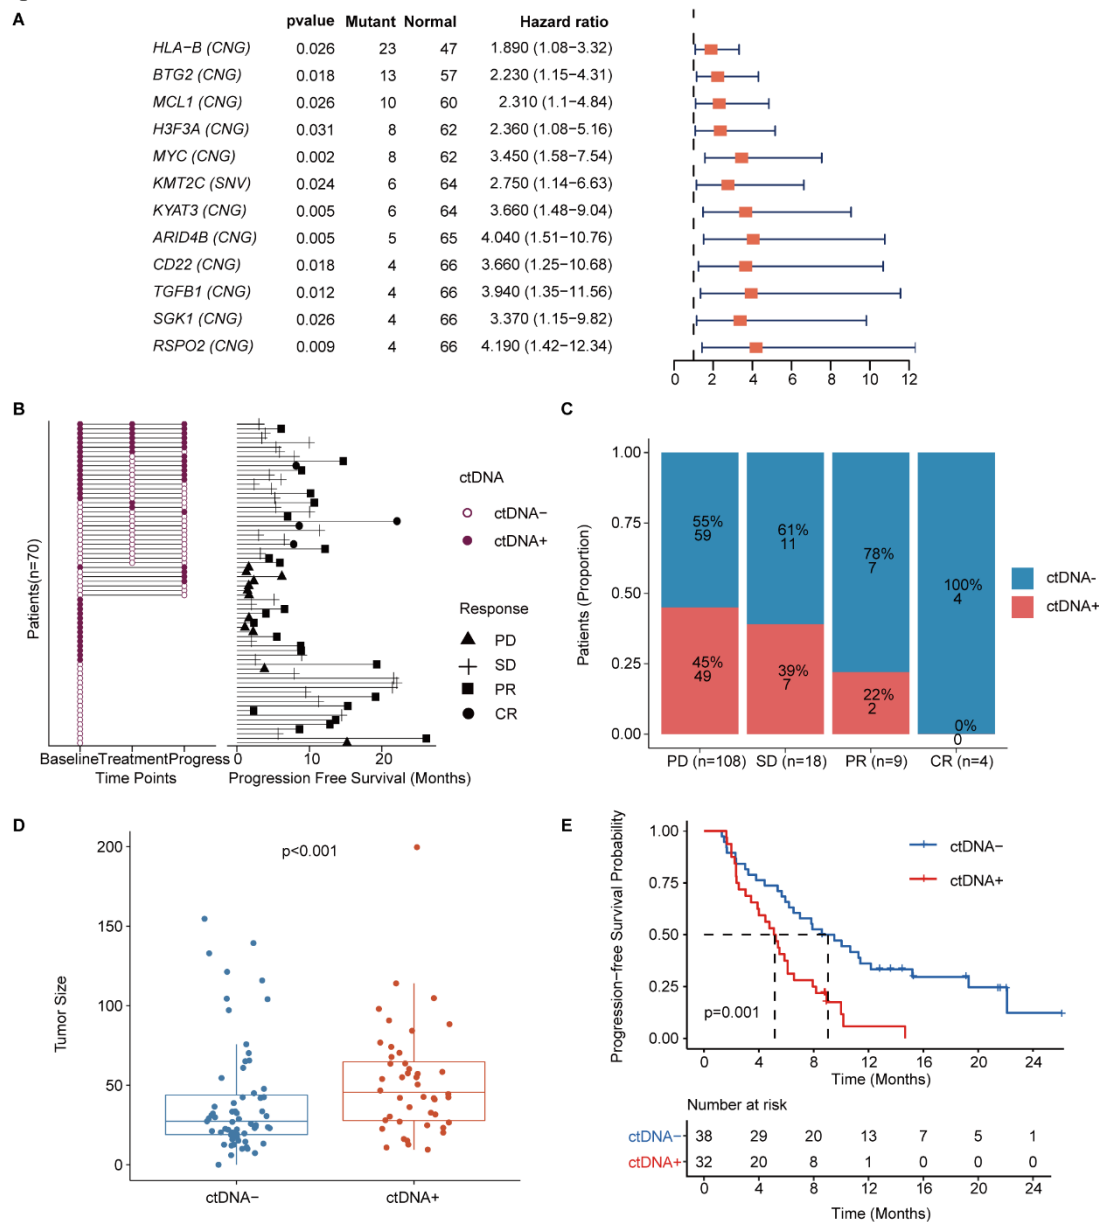

289

290 **Figure 3. Prognostic relevance of mutations in patients with mTNBC.** (A) Twelve mutated genes, comprising  
 291 *HLA-B* (CNG), *BTG2* (CNG), *MCL1* (CNG), *H3F3A* (CNG), *MYC* (CNG), *KMT2C* (SNV), *KYAT3* (CNG), *ARID4B*  
 292 (CNG), *CD22* (CNG), *TGFB1* (CNG), *SGK1* (CNG), and *RSPO2* (CNG) were identified as being associated with a  
 293 higher risk of recurrence or progression in patients with mTNBC (all had HRs > 1 and a  $P < 0.05$ ). (B) The left half  
 294 of the figure summarizes the ctDNA status of all patients ( $n = 70$ ) at different time points; among these, 38 patients  
 295 also had their ctDNA status recorded during treatment and at progression. Solid dots represent ctDNA+ patients,  
 296 while unfilled dots represent ctDNA- patients. The length of line segments in the right half of the figure denotes the  
 297 PFS of patients, whereby the bars indicate the best response (PD, SD, PR, or CR) observed during treatment. (C)  
 298 Comparison of ctDNA status (ctDNA+, red; ctDNA-, blue) among all the blood samples ( $n = 139$ ) from patients

299 with different treatment responses (PD, SD, PR, or CR). (D) The tumor size of the ctDNA+ group at baseline was  
 300 significantly greater than that of the ctDNA- group at baseline. (E) ctDNA+ at baseline was significantly associated  
 301 with a shorter PFS. CNG, copy number gain; CR, complete response; ctDNA, circulating tumor DNA; ctDNA-,  
 302 ctDNA negative; ctDNA+, ctDNA positive; HR, hazard ratio; mTNBC, metastatic triple-negative breast cancer; PD,  
 303 progressive disease; PFS, progression-free survival; PR, partial response; SD, stable disease; SNV, single-nucleotide  
 304 variant. A *P*-value < 0.05 was used as a measure of statistical significance.

305

306 Table 3. Multivariate cox regression analysis of multiple clinical factors and ctDNA  
 307 status with PFS of patients.

| Variable                                       | HR (95 CI)             | p value      |
|------------------------------------------------|------------------------|--------------|
| Age ( $\leq 50$ vs. $> 50$ years)              | 1.21 (0.47-3.1)        | 0.694        |
| Histopathologic diagnosis (IDC vs. non-IDC)    | 0.64 (0.15-2.73)       | 0.55         |
| Pathological grade (III vs. I-II)              | 1.23 (0.53-2.86)       | 0.629        |
| DFI ( $\leq 12$ months vs. $> 12$ months)      | 1.69 (0.6-4.71)        | 0.319        |
| <b>ctDNA status (ctDNA+ vs. ctDNA-)</b>        | <b>2.67 (1.2-5.96)</b> | <b>0.016</b> |
| T stage (T1 vs. T2 vs. T3)                     | 0.75 (0.38-1.47)       | 0.397        |
| N stage (N1 vs. N2 vs. N3)                     | 0.79 (0.57-1.1)        | 0.161        |
| CEA elevation (Yes vs. No)                     | 1.75 (0.64-4.81)       | 0.278        |
| CA125 elevation (Yes vs. No)                   | 0.67 (0.24-1.88)       | 0.445        |
| CA153 elevation (Yes vs. No)                   | 1.86 (0.62-5.57)       | 0.268        |
| Ki-67 ( $\geq 30\%$ vs. $< 30\%$ )             | 0.78 (0.33-1.88)       | 0.582        |
| Site of metastasis (visceral vs. non-visceral) | 0.54 (0.18-1.61)       | 0.267        |
| TMB (High vs. Low)                             | 1.08 (0.38-3.09)       | 0.88         |

308

### 309 **Baseline ctDNA-related markers are associated with mTNBC patient** 310 **survival and treatment response**

311 To further explore the value of ctDNA in predicting clinical outcomes in mTNBC, we  
 312 examined the association between the pre-treatment ctDNA-related markers (i.e., TMB,  
 313 MATH score, and ctDNA%) and PFS and the treatment response. Thus, we performed  
 314 Kaplan–Meier analyses of TMB, MATH score, ctDNA%, and PFS in patients with  
 315 mTNBC. Although not statistically significant, TMB-high ( $\geq 2.63$ ) patients tended to  
 316 have a shorter mPFS than the TMB-low ( $< 2.63$ ) patients (5.87 months vs. 10.03 months,  
 317  $P = 0.057$ ) (**Figure 4A**). Meanwhile, patients with a higher MATH score ( $\geq 6.316$ ) had  
 318 significantly shorter mPFS than patients with a lower MATH score ( $< 6.316$ ) (5.67  
 319 months vs. 11.27 months,  $P = 0.007$ ) (**Figure 4B**). Moreover, the higher ctDNA% ( $\geq$   
 320 0.05) patient group had a significantly shorter mPFS than the lower ctDNA% ( $< 0.05$ )

321 group (5.45 months vs. 12.17 months,  $P < 0.001$ ) (**Figure 4C**). Patients with mTNBC  
 322 were categorized into the PD, SD, PR, and CR groups according to their response to  
 323 treatment. Further comparative analysis of baseline ctDNA parameters in different  
 324 treatment response groups revealed that TMB was progressively lower across the four  
 325 groups, showing a decreasing trend from the PD group to the CR group. Compared with  
 326 other treatment response groups, the PD group had a larger TMB ( $P = 0.032$ ), greater  
 327 MATH score ( $P = 0.003$ ), and higher ctDNA% ( $P = 0.002$ ) (**Figure 4D–F**).

**Figure 4**

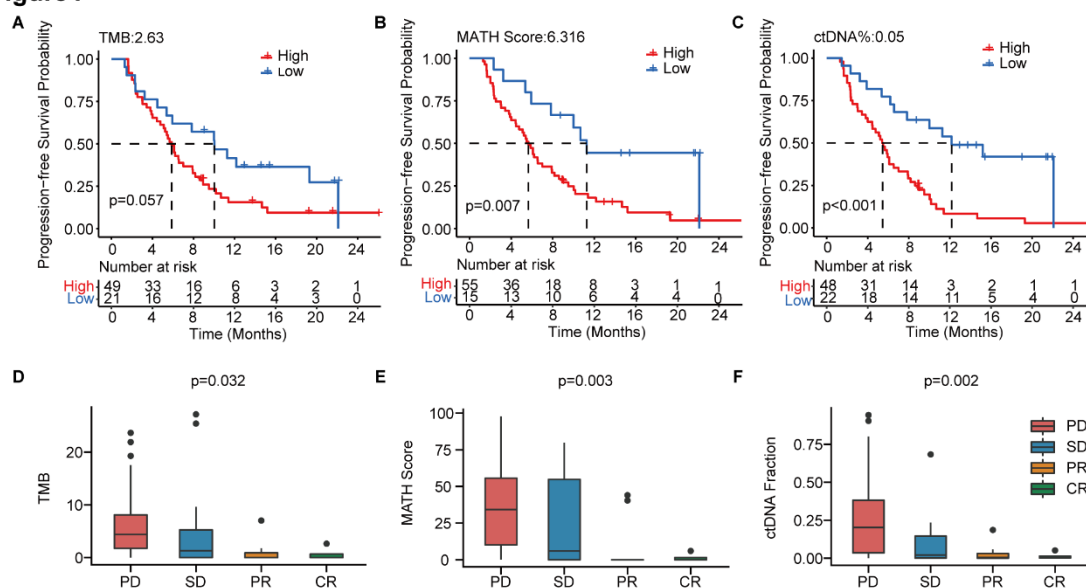

328  
 329 **Figure 4. The baseline-ctDNA-derived TMB, MATH score, and ctDNA% were associated with the clinical**  
 330 **outcomes of patients with mTNBC.** Higher TMB ( $\geq 2.63$ ) (A), MATH score ( $\geq 6.316$ ) (B), and ctDNA% ( $\geq 0.05$ )  
 331 (C) were linked to a shorter PFS. The optimal cut-off values for TMB, MATH score, and ctDNA% were determined  
 332 using the R package “survminer”. Comparison of TMB (D), MATH score (E), and ctDNA% (F) in patients with  
 333 different treatment responses (PD, SD, PR, or CR). CR, complete response; ctDNA, circulating tumor DNA;  
 334 ctDNA%, ctDNA fraction; mTNBC, metastatic triple-negative breast cancer; PFS, progression-free survival; PD,  
 335 progressive disease; PR, partial response; SD, stable disease; TMB, tumor mutational burden. A  $P$ -value  $< 0.05$  was  
 336 used as a measure of statistical significance.

337

338 **Dynamic changes in ctDNA are associated with treatment response of**  
 339 **patients with mTNBC**

340 **Figure 5A–D** highlight the dynamic changes in ctDNA levels (i.e., mutations in 12  
 341 prognosis-relevant genes) and traditional tumor markers in each patient with PD  
 342 (Patient 32), SD (Patient 31), PR (Patient 29), or CR (Patient 18). For instance in Patient  
 343 32, the MAF of *MYC* ctDNA increased significantly and was accompanied by increased

344 CA125 and CA153 levels and decreased CEA levels at the time of disease progression  
345 (**Figure 5A**). **Figure 5B–D** shows evidence of ctDNA mutations in Patient 31 (*BTG2*,  
346 *ARID4B*, *CD22*, *H3F3A*, *HLA-B*, *MCL1*, *MYC*, *RSPO2*), Patient 29 (*BTG2*, *ARID4B*,  
347 *H3F3A*, *HLA-B*, *MCL1*, *MYC*), and Patient 18 (*BTG2*, *ARID4B*, *H3F3A*, *HLA-B*,  
348 *SGKI*); their mutational rates dropped to the lowest level during the best response to  
349 treatment and rose again during progression. CA125 levels varied in line with treatment  
350 response and progression but no similar fluctuations were observed for CA153 and  
351 CEA. However, compared with the traditional tumor markers, dynamic changes in  
352 ctDNA mutations seemed to better mirror treatment-induced changes in tumor size. We  
353 therefore analyzed the correlation between the levels of serum tumor markers and tumor  
354 size on computed tomography (CT) scans during treatment (**Figure 5E**). We found that  
355 tumor size positively correlated with the MATH score ( $R = 0.24$ ,  $P = 0.014$ ) and ctDNA%  
356 ( $R = 0.3$ ,  $P = 0.002$ ), but not CEA, CA125, or CA153 levels. There were also strong  
357 positive correlations among the three ctDNA-related markers, TMB, MATH score, and  
358 ctDNA%. Moreover, the dynamic changes in ctDNA status may predict the prognosis  
359 of mTNBC. Kaplan–Meier analysis found that patients who remained ctDNA+ during  
360 dynamic monitoring had a shorter PFS than those who did not (3.90 months vs. 6.10  
361 months,  $P = 0.135$ ) (**Figure 5F**); however, this difference did not achieve statistical  
362 significance, most likely due to the limited sample size.



**Figure5**

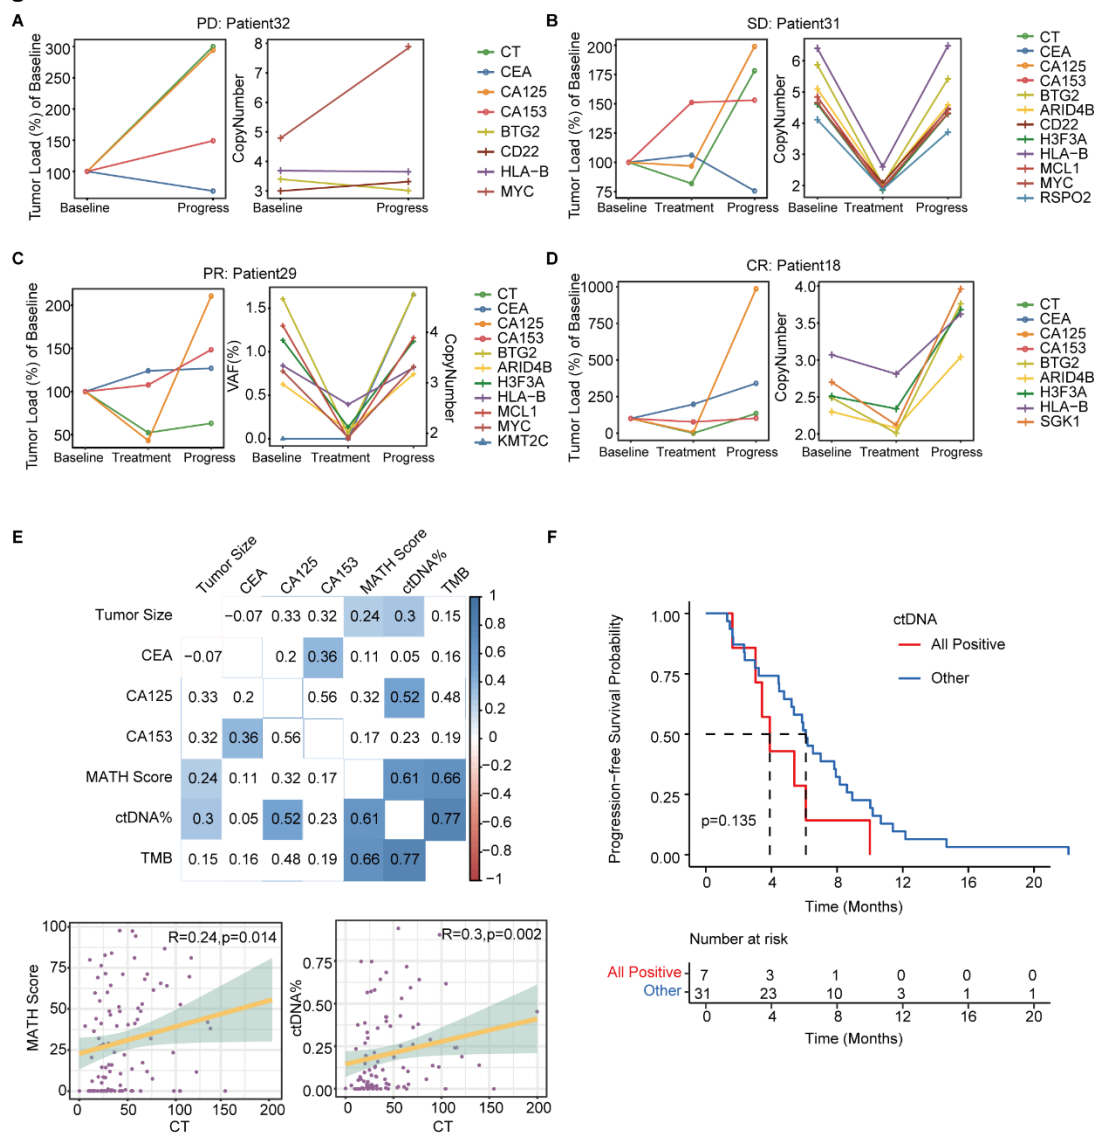

363  
 364 **Figure 5. Dynamic ctDNA changes in patients with mTNBC.** (A–D) Dynamic changes in tumor size were  
 365 observed using computed tomography (CT) scans and the conventional tumor markers CEA, CA125, and CA153  
 366 (left side) or the VAF/copy number of 12 prognosis-relevant genes (right side) in four patients who each had a  
 367 different best treatment response: PD (Patient 32), SD (Patient 31), PR (Patient 29), and CR (Patient 18). (E) The  
 368 correlation between tumor size (measured using CT scans) and conventional tumor markers (CEA, CA125, CA153)  
 369 or ctDNA parameters (TMB, MATH score, ctDNA%). Blue: positive correlation; red: negative correlation (the  
 370 stronger the correlation, the darker the color). (F) Patients with a ctDNA+ status across all time points (All positive)  
 371 tended to have a shorter PFS than those who were ctDNA– at least once during the process of dynamic monitoring  
 372 (Other). CR, complete response; ctDNA, circulating tumor DNA; ctDNA–, ctDNA negative; ctDNA+, ctDNA  
 373 positive; ctDNA%, ctDNA fraction; mTNBC, metastatic triple-negative breast cancer; PFS, progression-free  
 374 survival; PD, progressive disease; PR, partial response; SD, stable disease; TMB, tumor mutational burden; VAF,  
 375 variant allelic frequency. A *P*-value < 0.05 was used as a measure of statistical significance.

376

## 377 Discussion

378 Since the advent of precision medicine, liquid biopsies have become more widely  
379 utilized in the clinical management of cancer. In recent years, ctDNA has become the  
380 focus of extensive research as a predictive biomarker of tumor progression and/or  
381 treatment response. Several studies have explored the promising applications of ctDNA  
382 in breast cancer. For example, some researchers have investigated the longitudinal  
383 dynamics of ctDNA in the treatment monitoring of metastatic breast cancer, while  
384 others have studied the prognostic and predictive value of ctDNA during neoadjuvant  
385 chemotherapy for TNBC(Cavallone et al., 2020; Gerratana et al., 2021; Ortolan et al.,  
386 2021; Riva et al., 2017). However, the application of ctDNA in monitoring mTNBC is  
387 rare in clinical practice.

388 In the current study, we performed targeted, capture-based NGS (with a 457-gene  
389 panel) on 139 plasma samples obtained by liquid biopsy from 70 patients with mTNBC.  
390 Thirteen paired tumor tissues were also analyzed to verify if ctDNA could be a feasible  
391 alternative to tumor-tissue-derived tDNA. This study demonstrated how a ctDNA-  
392 based platform could reliably reveal mutational profiles, stably predict the prognosis,  
393 and consistently monitor the treatment response of patients with mTNBC. This study  
394 also resolved the uncertainty of some current studies regarding the value of ctDNA and  
395 provided clear ctDNA-related predictive markers for mTNBC patients. By evaluating  
396 the mutational landscape of mTNBC in the Chinese population using ctDNA analysis,  
397 we showed that the most frequently mutated genes were *TP53*, *PIK3CA*, *ARID1A*, and  
398 *KMT2C*, and the most frequent CNV was detected in *HLA-C*, *HLA-A*, *HLA-B*, and *HLA-*  
399 *DRB1* (**Figure 2A**). These genes play significant roles in the tumorigenesis, progression,  
400 invasion, and metastasis of breast cancer. In the homogeneous population, the most  
401 common mutations detected in tumor tissue were *TP53*, followed by *PIK3CA*, *KMT2C*,  
402 and *PTEN*; however, the top-ranking CNVs were found in different genes to those  
403 identified in a previous report: *E2F3*, *IRS2*, *CCNE1*, *EGFR*, *NFIB*, *CCND1*, and  
404 *MYB*(Jiang et al., 2019). This difference may be due to the fact that the plasma-derived  
405 ctDNA contains smaller fragments than those that are typically found in tissue-derived  
406 tDNA. Meanwhile, compared with the results of other ctDNA identification studies, the  
407 distribution of frequent variants in the TNBC cohort was overall consistent(Davis et al.,

408 2020; Rong et al., 2020; Wang et al., 2021). In the study by Chae et al., the concordance  
409 between all ctDNA- and tDNA-derived genes was also similar to that in our study  
410 (91.0%–94.2% vs. 98.75%)(Chae et al., 2017) (**Figure 2B**). The authors reported that  
411 the ctDNA-based assay had a high specificity, with a diagnostic accuracy of up to 80%.  
412 Although the mutation frequency of tDNA was higher than that of ctDNA in our study,  
413 the number of mutations detected in both types of DNA was similar. In addition, we  
414 detected 37 specific mutations in each of the ctDNA and tDNA groups, demonstrating  
415 the complementarity of blood-derived ctDNA and tissue-derived tDNA. Moreover,  
416 compared with tumor tissue analysis, ctDNA assays only require a small blood sample,  
417 can capture a variety of mutations (including SNVs and CNVs), and provide  
418 information on spatial tumor heterogeneity.

419 Using NGS, we identified 12 prognosis-relevant mutated genes, which were  
420 associated with the shorter PFS of patients with mTNBC (**Supplementary Figure 3**).  
421 Most of the 12 genes have been linked to breast cancer by previous studies. For instance,  
422 the aberrant expression of *KMT2C* (low expression) and *ARID4B* (high expression)  
423 contribute to the poor prognosis of patients with ER-positive breast cancer(Sato &  
424 Akimoto, 2017; J. Zhang et al., 2021). However, previous studies have shown that the  
425 upregulated expression of *BTG2* and *CD22* were associated with improved survival,  
426 which is not in agreement with our current findings(Mascia et al., 2022; Y. J. Zhang et  
427 al., 2013); this may be due to the low number of patients included in this study. *TGFBI*,  
428 *SGKI*, *RSPO2*, and *MCL1* are implicated in the invasion, migration, growth, autophagy,  
429 and progression of TNBC, while *RSPO2* and *MCL1* overexpression is associated with  
430 shorter survival rates in patients with TNBC(Coussy et al., 2017; S. Kim, Lee, Jeon,  
431 Nam, & Lee, 2015; Yang et al., 2014; Zhu et al., 2020).

432 As a common driver of breast cancer, *MYC* amplification plays a role in emerging or  
433 acquired chemotherapy resistance during neoadjuvant treatment of TNBC and can also  
434 synergize with *MCL1* amplification to maintain chemoresistance(Lee et al., 2017).  
435 *HLA-B*, a major histocompatibility complex (MHC) class I molecule, is involved in  
436 immunosurveillance against tumors and its expression is correlated with the  
437 invasiveness and prognosis of breast cancer(Concha, Esteban, Cabrera, Ruiz-Cabello,

438 & Garrido, 1991). To date, there have been no reports of an association between *H3F3A*  
439 or *KYAT3* and breast cancer. Previously, *H3F3A* was identified as a driver gene in  
440 glioma, and its overexpression is linked to shorter survival rates and disease progression  
441 in lung cancer (Felker & Broniscer, 2020; Park et al., 2016). Thus, although the  
442 associations between some of the 12 mutated genes identified in our study and cancer  
443 are known, their roles in the prognosis of mTNBC need to be further defined.

444 We also explored the value of ctDNA status as a biomarker for predicting the  
445 prognosis and monitoring the treatment response of patients with mTNBC. We found  
446 that a ctDNA+ status was associated with a worse treatment response (**Figure 3B, C**).  
447 In addition, we showed that the ctDNA status at baseline could potentially discriminate  
448 between mTNBC patients with a high or low lesion load (**Figure 3D**), predict their  
449 prognosis (**Figure 3E**), and act as an independent prognostic factor (**Table 3**). This  
450 indicates that the ctDNA status, associated with the presence of the 12 prognosis-  
451 relevant mutated genes, may be a good guide to the prediction of clinical outcomes and  
452 the clinical management of TNBC. We further explored the optimal cut-off values for  
453 the ctDNA-based TMB, MATH score, and ctDNA% parameters at baseline using  
454 Kaplan–Meier analysis. A high MATH score ( $\geq 6.316$ ) and high ctDNA% ( $\geq 0.05$ ) were  
455 associated with a significantly shorter PFS (**Figure 4B, C**) and may therefore be related  
456 to the tumor burden of mTNBC. A study reported that most ctDNA fragments originate  
457 from metastases and not early-stage cancer, suggesting that ctDNA-based NGS may be  
458 more suitable for the analysis of metastatic tumors (Vandekerkhove et al., 2017). Unlike  
459 ctDNA%, the MATH score represents tumor heterogeneity. A previous study found that  
460 TNBC was associated with a higher MATH score (Ma, Jiang, Liu, Liu, & Shao, 2017).  
461 Moreover, patients with higher MATH ("Clinical practice guidelines for the use of  
462 tumor markers in breast and colorectal cancer. Adopted on May 17, 1996 by the  
463 American Society of Clinical Oncology," 1996) scores tend to have more diverse tumor  
464 cell clones and may be more prone to drug resistance and progression (McDonald et al.,  
465 2019; Mroz & Rocco, 2013). Thus, the MATH score could also potentially be used as  
466 a biomarker for mTNBC prognosis.

467 Breast cancer is a highly heterogeneous and dynamic disease; therefore, longitudinal

468 monitoring and management are necessary(Garcia-Murillas et al., 2015). The predictive  
469 value of ctDNA has prompted further exploration of its feasibility in the dynamic  
470 monitoring of the efficacy of neoadjuvant therapy for breast cancer, and in predicting  
471 the occurrence of distal metastasis and drug resistance(Cavallone et al., 2020; Darrigues  
472 et al., 2021; Wang et al., 2021). Here, we monitored ctDNA to track the dynamic  
473 changes in the 12 identified prognosis-related genes during the treatment of patients  
474 with mTNBC. The results showed that the elimination of these mutations or the  
475 reduction in the mutation rate of these genes was often associated with a better  
476 treatment response. Conversely, reappearance of these mutations at a later time point or  
477 an increase in their mutation rate signaled disease progression. Thus, we showed that  
478 the analysis of ctDNA was sensitive and accurately reflected the treatment response and  
479 disease status of patients with mTNBC in a timely manner. Conventional tumor markers  
480 have been widely used in clinical cancer management for some time("Clinical practice  
481 guidelines for the use of tumor markers in breast and colorectal cancer. Adopted on  
482 May 17, 1996 by the American Society of Clinical Oncology," 1996). We found that,  
483 the serum CEA and CA153 levels contradicted the treatment response of Patient 31 at  
484 the mid-treatment time point (**Figure 5B**). The elevation of conventional tumor markers  
485 could indicate changes in the tumor and could be interpreted as an early warning of  
486 disease progression or pseudo-progression. However, this pseudo-progression or  
487 "tumor marker spike" is actually caused by extensive neoplastic cell necrosis induced  
488 by anti-tumor therapy. This phenomenon is observed in up to 30% of patients who  
489 respond to treatment(Seregni, Coli, & Mazzucca, 2004). NGS-mediated ctDNA  
490 detection identifies hundreds or thousands of mutations. Even if individual mutations  
491 were the result of a "ctDNA spike" (similar to a "tumor marker spike"), other mutations  
492 could be relied upon to accurately signal treatment efficacy. Moreover, we observed  
493 positive correlations between treatment response and MATH score and ctDNA%, but  
494 not the CEA, CA125, and CA153 levels (**Figure 5E**). Hence, compared with  
495 conventional tumor markers, ctDNA dynamics may better reflect treatment response  
496 and progression in mTNBC.

497 Several limitations exist in our study. First, this was a single-center study with a small

498 sample size. Second, the relatively short median follow-up duration was insufficient for  
499 capturing a clinically significant association between ctDNA mutations and overall  
500 survival. Third, several patients were lost to follow-up, which may have biased the  
501 results. Fourth, the potential influence of different treatment lines and regimens was not  
502 evaluated; nevertheless, no differences were found in survival based on these factors.  
503 Finally, compared with whole-exome sequencing or whole-genome sequencing, NGS  
504 with a panel of 457 selected genes, as used in our study, provided limited mutation data.

505

## 506 **Conclusions**

507 ctDNA profiling is a good alternative to tumor tissue sequencing and provides valuable  
508 insights into the mutational landscape of mTNBC. Furthermore, our study addressed  
509 the value of ctDNA in predicting the prognosis and monitoring the treatment response  
510 of patients with mTNBC. The results revealed that higher ctDNA%, MATH score, TMB,  
511 ctDNA+ status, and mutation rate were associated with a poor prognosis and a worse  
512 treatment response in mTNBC. Moreover, the longitudinal monitoring of genetic  
513 biomarkers in ctDNA was more sensitive and accurate for discerning treatment  
514 response or progression than traditional tumor markers such as CEA, CA125, and  
515 CA153. Taken together, these findings will contribute to a better understanding of  
516 ctDNA in mTNBC and may facilitate the development of a more accurate and non-  
517 invasive clinical strategy for managing patients with this condition. However, larger  
518 clinical trials are necessary to validate our results.

519

## 520 **Additional information**

### 521 **Competing interests**

522 The authors declare no potential conflicts of interest.

### 523 **Funding**

| Funder                                          | Grant No.    | Author     |
|-------------------------------------------------|--------------|------------|
| National Natural Science Foundation of China    | 81902713     | Huihui Li  |
| Natural Science Foundation of Shandong Province | ZR2019LZL018 | Jinming Yu |

---

|                                                                         |                  |           |
|-------------------------------------------------------------------------|------------------|-----------|
| Breast Disease Research Fund of Shandong Provincial Medical Association | YXH2020ZX066     | Huihui Li |
| Start-up Fund of Shandong Cancer Hospital                               | 2020-PYB10       | Huihui Li |
| Beijing Science and Technology Innovation Fund                          | KC2021-ZZ-0010-1 | Huihui Li |

---

524 **Acknowledgments**

525 We sincerely thank the support of Yongsheng Wang, Pengfei Qiu, Binbin Cong, Peng  
526 Chen, Yanbing Liu, Chunjian Wang, Zhaopeng Zhang, Tong Zhao, Xiao Sun, Zhiyong  
527 Yu, Zhijun Huo, Xinzhao Wang, Shubin Song, Liang Zhang, Zhaoyun Liu, Fukai Wang,  
528 Chao Li, Xiang Song, Wenshu Zuo, Hui Fu, Meizhu Zheng, Ben Yang, Chao Han, Qian  
529 Shao, Xijun Liu, Jinzhi Wang, Wei Wang, Fengxiang Li, Yun Zhao, Linlin Wang,  
530 Bingjie Fan, Bing Zou, Zhenhua Gao, Xiangjiao Meng, Liyang Jiang, Zhengqiang Yang  
531 and Peng Xie. We also thank Liwen Bianji (Edanz) ([www.liwenbianji.cn](http://www.liwenbianji.cn)) for editing a  
532 draft of this manuscript.

533 **Ethics**

534 Human subjects: The study was approved by the Ethics Committee of Shandong Cancer  
535 Hospital and Institute (approval number: SDTHEC201806003) that collection of  
536 information, tumor tissues and blood samples within the ethical limitation of the patients,  
537 and conducted according to the Declaration of Helsinki. Written informed consent was  
538 obtained from all patients.

539 **Data Availability**

540 The raw sequence data generated during the current study have been deposited in the  
541 China National Genomics Data Center (<https://ngdc.cncb.ac.cn/gsa-human/>). The data  
542 under accession HRA002598 will be available on 27 June 2024 and are also available  
543 from the corresponding author upon reasonable request.

544

545 **References**

- 546 Alix-Panabières, C., & Pantel, K. (2016). Clinical Applications of Circulating Tumor  
547 Cells and Circulating Tumor DNA as Liquid Biopsy. *Cancer Discov*, 6(5), 479-  
548 491. doi:10.1158/2159-8290.Cd-15-1483
- 549 Asante, D. B., Calapre, L., Ziman, M., Meniawy, T. M., & Gray, E. S. (2020). Liquid

- 550 biopsy in ovarian cancer using circulating tumor DNA and cells: Ready for  
551 prime time? *Cancer Lett*, 468, 59-71. doi:10.1016/j.canlet.2019.10.014
- 552 Barroso-Sousa, R., Forman, J., Collier, K., Weber, Z. T., Jammihal, T. R., Kao, K. Z., . . .  
553 Tolaney, S. M. (2022). Multidimensional Molecular Profiling of Metastatic  
554 Triple-Negative Breast Cancer and Immune Checkpoint Inhibitor Benefit. *JCO*  
555 *Precis Oncol*, 6, e2100413. doi:10.1200/po.21.00413
- 556 Burstein, M. D., Tsimelzon, A., Poage, G. M., Covington, K. R., Contreras, A., Fuqua,  
557 S. A., . . . Brown, P. H. (2015). Comprehensive genomic analysis identifies  
558 novel subtypes and targets of triple-negative breast cancer. *Clin Cancer Res*,  
559 21(7), 1688-1698. doi:10.1158/1078-0432.Ccr-14-0432
- 560 Campos-Carrillo, A., Weitzel, J. N., Sahoo, P., Rockne, R., Mokhnatkin, J. V., Murtaza,  
561 M., . . . Slavin, T. P. (2020). Circulating tumor DNA as an early cancer detection  
562 tool. *Pharmacol Ther*, 207, 107458. doi:10.1016/j.pharmthera.2019.107458
- 563 Cavallone, L., Aguilar-Mahecha, A., Lafleur, J., Brousse, S., Aldamry, M., Roseshter,  
564 T., . . . Basik, M. (2020). Prognostic and predictive value of circulating tumor  
565 DNA during neoadjuvant chemotherapy for triple negative breast cancer. *Sci*  
566 *Rep*, 10(1), 14704. doi:10.1038/s41598-020-71236-y
- 567 Chae, Y. K., Davis, A. A., Jain, S., Santa-Maria, C., Flaum, L., Beaubier, N., . . .  
568 Cristofanilli, M. (2017). Concordance of Genomic Alterations by Next-  
569 Generation Sequencing in Tumor Tissue versus Circulating Tumor DNA in  
570 Breast Cancer. *Mol Cancer Ther*, 16(7), 1412-1420. doi:10.1158/1535-  
571 7163.Mct-17-0061
- 572 Chae, Y. K., & Oh, M. S. (2019). Detection of Minimal Residual Disease Using ctDNA  
573 in Lung Cancer: Current Evidence and Future Directions. *J Thorac Oncol*, 14(1),  
574 16-24. doi:10.1016/j.jtho.2018.09.022
- 575 Chalmers, Z. R., Connelly, C. F., Fabrizio, D., Gay, L., Ali, S. M., Ennis, R., . . .  
576 Frampton, G. M. (2017). Analysis of 100,000 human cancer genomes reveals  
577 the landscape of tumor mutational burden. *Genome Med*, 9(1), 34.  
578 doi:10.1186/s13073-017-0424-2
- 579 Chen, S., Zhou, Y., Chen, Y., & Gu, J. (2018). fastp: an ultra-fast all-in-one FASTQ



580 preprocessor. *Bioinformatics*, 34(17), i884-i890.  
581 doi:10.1093/bioinformatics/bty560

582 Chen, S., Zhou, Y., Chen, Y., Huang, T., Liao, W., Xu, Y., . . . Gu, J. (2019). Gencore:  
583 an efficient tool to generate consensus reads for error suppressing and duplicate  
584 removing of NGS data. *BMC Bioinformatics*, 20(Suppl 23), 606.  
585 doi:10.1186/s12859-019-3280-9

586 Chopra, N., Tovey, H., Pearson, A., Cutts, R., Toms, C., Proszek, P., . . . Turner, N. C.  
587 (2020). Homologous recombination DNA repair deficiency and PARP  
588 inhibition activity in primary triple negative breast cancer. *Nat Commun*, 11(1),  
589 2662. doi:10.1038/s41467-020-16142-7

590 Clinical practice guidelines for the use of tumor markers in breast and colorectal cancer.  
591 Adopted on May 17, 1996 by the American Society of Clinical Oncology.  
592 (1996). *J Clin Oncol*, 14(10), 2843-2877. doi:10.1200/jco.1996.14.10.2843

593 Collier, K. A., Asad, S., Tallman, D., Jenison, J., Rajkovic, A., Mardis, E. R., . . . Stover,  
594 D. G. (2021). Association of 17q22 Amplicon Via Cell-Free DNA With  
595 Platinum Chemotherapy Response in Metastatic Triple-Negative Breast Cancer.  
596 *JCO Precis Oncol*, 5. doi:10.1200/po.21.00104

597 Concha, A., Esteban, F., Cabrera, T., Ruiz-Cabello, F., & Garrido, F. (1991). Tumor  
598 aggressiveness and MHC class I and II antigens in laryngeal and breast cancer.  
599 *Semin Cancer Biol*, 2(1), 47-54.

600 Coussy, F., Lallemand, F., Vacher, S., Schnitzler, A., Chemlali, W., Caly, M., . . . Bièche,  
601 I. (2017). Clinical value of R-spondins in triple-negative and metaplastic breast  
602 cancers. *Br J Cancer*, 116(12), 1595-1603. doi:10.1038/bjc.2017.131

603 Darrigues, L., Pierga, J. Y., Bernard-Tessier, A., Bièche, I., Silveira, A. B., Michel,  
604 M., . . . Bidard, F. C. (2021). Circulating tumor DNA as a dynamic biomarker  
605 of response to palbociclib and fulvestrant in metastatic breast cancer patients.  
606 *Breast Cancer Res*, 23(1), 31. doi:10.1186/s13058-021-01411-0

607 Davis, A. A., Jacob, S., Gerratana, L., Shah, A. N., Wehbe, F., Katam, N., . . .  
608 Cristofanilli, M. (2020). Landscape of circulating tumour DNA in metastatic  
609 breast cancer. *EBioMedicine*, 58, 102914. doi:10.1016/j.ebiom.2020.102914

- 610 Dawson, S. J., Tsui, D. W., Murtaza, M., Biggs, H., Rueda, O. M., Chin, S. F., . . .  
611 Rosenfeld, N. (2013). Analysis of circulating tumor DNA to monitor metastatic  
612 breast cancer. *N Engl J Med*, 368(13), 1199-1209.  
613 doi:10.1056/NEJMoa1213261
- 614 Diaz, L. A., Jr., & Bardelli, A. (2014). Liquid biopsies: genotyping circulating tumor  
615 DNA. *J Clin Oncol*, 32(6), 579-586. doi:10.1200/jco.2012.45.2011
- 616 Eisenhauer, E. A., Therasse, P., Bogaerts, J., Schwartz, L. H., Sargent, D., Ford, R., . . .  
617 Verweij, J. (2009). New response evaluation criteria in solid tumours: revised  
618 RECIST guideline (version 1.1). *Eur J Cancer*, 45(2), 228-247.  
619 doi:10.1016/j.ejca.2008.10.026
- 620 Felker, J., & Broniscer, A. (2020). Improving long-term survival in diffuse intrinsic  
621 pontine glioma. *Expert Rev Neurother*, 20(7), 647-658.  
622 doi:10.1080/14737175.2020.1775584
- 623 Foulkes, W. D., Smith, I. E., & Reis-Filho, J. S. (2010). Triple-negative breast cancer.  
624 *N Engl J Med*, 363(20), 1938-1948. doi:10.1056/NEJMra1001389
- 625 Garcia-Murillas, I., Schiavon, G., Weigelt, B., Ng, C., Hrebien, S., Cutts, R. J., . . .  
626 Turner, N. C. (2015). Mutation tracking in circulating tumor DNA predicts  
627 relapse in early breast cancer. *Sci Transl Med*, 7(302), 302ra133.  
628 doi:10.1126/scitranslmed.aab0021
- 629 Gerratana, L., Davis, A. A., Zhang, Q., Basile, D., Rossi, G., Strickland, K., . . .  
630 Cristofanilli, M. (2021). Longitudinal Dynamics of Circulating Tumor Cells and  
631 Circulating Tumor DNA for Treatment Monitoring in Metastatic Breast Cancer.  
632 *JCO Precis Oncol*, 5, 943-952. doi:10.1200/po.20.00345
- 633 Jiang, Y. Z., Ma, D., Suo, C., Shi, J., Xue, M., Hu, X., . . . Shao, Z. M. (2019). Genomic  
634 and Transcriptomic Landscape of Triple-Negative Breast Cancers: Subtypes  
635 and Treatment Strategies. *Cancer Cell*, 35(3), 428-440.e425.  
636 doi:10.1016/j.ccell.2019.02.001
- 637 Kim, H., Kim, Y. J., Park, D., Park, W. Y., Choi, D. H., Park, W., . . . Kim, N. (2021).  
638 Dynamics of circulating tumor DNA during postoperative radiotherapy in  
639 patients with residual triple-negative breast cancer following neoadjuvant

- 640 chemotherapy: a prospective observational study. *Breast Cancer Res Treat*,  
641 189(1), 167-175. doi:10.1007/s10549-021-06296-3
- 642 Kim, S., Lee, J., Jeon, M., Nam, S. J., & Lee, J. E. (2015). Elevated TGF- $\beta$ 1 and - $\beta$ 2  
643 expression accelerates the epithelial to mesenchymal transition in triple-  
644 negative breast cancer cells. *Cytokine*, 75(1), 151-158.  
645 doi:10.1016/j.cyto.2015.05.020
- 646 Lee, K. M., Giltnane, J. M., Balko, J. M., Schwarz, L. J., Guerrero-Zotano, A. L.,  
647 Hutchinson, K. E., . . . Arteaga, C. L. (2017). MYC and MCL1 Cooperatively  
648 Promote Chemotherapy-Resistant Breast Cancer Stem Cells via Regulation of  
649 Mitochondrial Oxidative Phosphorylation. *Cell Metab*, 26(4), 633-647.e637.  
650 doi:10.1016/j.cmet.2017.09.009
- 651 Li, H., & Durbin, R. (2009). Fast and accurate short read alignment with Burrows-  
652 Wheeler transform. *Bioinformatics*, 25(14), 1754-1760.  
653 doi:10.1093/bioinformatics/btp324
- 654 Li, H., Handsaker, B., Wysoker, A., Fennell, T., Ruan, J., Homer, N., . . . Durbin, R.  
655 (2009). The Sequence Alignment/Map format and SAMtools. *Bioinformatics*,  
656 25(16), 2078-2079. doi:10.1093/bioinformatics/btp352
- 657 Li, J., Lupat, R., Amarasinghe, K. C., Thompson, E. R., Doyle, M. A., Ryland, G. L., . . .  
658 Goringe, K. L. (2012). CONTRA: copy number analysis for targeted  
659 resequencing. *Bioinformatics*, 28(10), 1307-1313.  
660 doi:10.1093/bioinformatics/bts146
- 661 Li, X., Yang, J., Peng, L., Sahin, A. A., Huo, L., Ward, K. C., . . . Meisel, J. L. (2017).  
662 Triple-negative breast cancer has worse overall survival and cause-specific  
663 survival than non-triple-negative breast cancer. *Breast Cancer Res Treat*, 161(2),  
664 279-287. doi:10.1007/s10549-016-4059-6
- 665 Lin, P. H., Wang, M. Y., Lo, C., Tsai, L. W., Yen, T. C., Huang, T. Y., . . . Huang, C. S.  
666 (2021). Circulating Tumor DNA as a Predictive Marker of Recurrence for  
667 Patients With Stage II-III Breast Cancer Treated With Neoadjuvant Therapy.  
668 *Front Oncol*, 11, 736769. doi:10.3389/fonc.2021.736769
- 669 Ma, D., Jiang, Y. Z., Liu, X. Y., Liu, Y. R., & Shao, Z. M. (2017). Clinical and molecular

- 670 relevance of mutant-allele tumor heterogeneity in breast cancer. *Breast Cancer*  
671 *Res Treat*, 162(1), 39-48. doi:10.1007/s10549-017-4113-z
- 672 Madic, J., Kiialainen, A., Bidard, F. C., Birzele, F., Ramey, G., Leroy, Q., . . . Lebofsky,  
673 R. (2015). Circulating tumor DNA and circulating tumor cells in metastatic  
674 triple negative breast cancer patients. *Int J Cancer*, 136(9), 2158-2165.  
675 doi:10.1002/ijc.29265
- 676 Malorni, L., Shetty, P. B., De Angelis, C., Hilsenbeck, S., Rimawi, M. F., Elledge, R., . . .  
677 Arpino, G. (2012). Clinical and biologic features of triple-negative breast  
678 cancers in a large cohort of patients with long-term follow-up. *Breast Cancer*  
679 *Res Treat*, 136(3), 795-804. doi:10.1007/s10549-012-2315-y
- 680 Maron, S. B., Chase, L. M., Lomnicki, S., Kochanny, S., Moore, K. L., Joshi, S. S., . . .  
681 Catenacci, D. V. T. (2019). Circulating Tumor DNA Sequencing Analysis of  
682 Gastroesophageal Adenocarcinoma. *Clin Cancer Res*, 25(23), 7098-7112.  
683 doi:10.1158/1078-0432.Ccr-19-1704
- 684 Mascia, F., Mazo, I., Alterovitz, W. L., Karagiannis, K., Wu, W. W., Shen, R. F., . . .  
685 Rao, V. A. (2022). In search of autophagy biomarkers in breast cancer: Receptor  
686 status and drug agnostic transcriptional changes during autophagy flux in cell  
687 lines. *PLoS One*, 17(1), e0262134. doi:10.1371/journal.pone.0262134
- 688 McDonald, K. A., Kawaguchi, T., Qi, Q., Peng, X., Asaoka, M., Young, J., . . . Takabe,  
689 K. (2019). Tumor Heterogeneity Correlates with Less Immune Response and  
690 Worse Survival in Breast Cancer Patients. *Ann Surg Oncol*, 26(7), 2191-2199.  
691 doi:10.1245/s10434-019-07338-3
- 692 Mroz, E. A., & Rocco, J. W. (2013). MATH, a novel measure of intratumor genetic  
693 heterogeneity, is high in poor-outcome classes of head and neck squamous cell  
694 carcinoma. *Oral Oncol*, 49(3), 211-215.  
695 doi:10.1016/j.oraloncology.2012.09.007
- 696 Murtaza, M., Dawson, S. J., Tsui, D. W., Gale, D., Forshew, T., Piskorz, A. M., . . .  
697 Rosenfeld, N. (2013). Non-invasive analysis of acquired resistance to cancer  
698 therapy by sequencing of plasma DNA. *Nature*, 497(7447), 108-112.  
699 doi:10.1038/nature12065

- 700 Ortolan, E., Appierto, V., Silvestri, M., Miceli, R., Veneroni, S., Folli, S., . . . Di Cosimo,  
701 S. (2021). Blood-based genomics of triple-negative breast cancer progression in  
702 patients treated with neoadjuvant chemotherapy. *ESMO Open*, 6(2), 100086.  
703 doi:10.1016/j.esmoop.2021.100086
- 704 Palmirotta, R., Lovero, D., Cafforio, P., Felici, C., Mannavola, F., Pellè, E., . . . Silvestris,  
705 F. (2018). Liquid biopsy of cancer: a multimodal diagnostic tool in clinical  
706 oncology. *Ther Adv Med Oncol*, 10, 1758835918794630.  
707 doi:10.1177/1758835918794630
- 708 Park, S. M., Choi, E. Y., Bae, M., Kim, S., Park, J. B., Yoo, H., . . . Kim, I. H. (2016).  
709 Histone variant H3F3A promotes lung cancer cell migration through intronic  
710 regulation. *Nat Commun*, 7, 12914. doi:10.1038/ncomms12914
- 711 Perou, C. M. (2011). Molecular stratification of triple-negative breast cancers.  
712 *Oncologist*, 16 Suppl 1, 61-70. doi:10.1634/theoncologist.2011-S1-61
- 713 Poulet, G., Massias, J., & Taly, V. (2019). Liquid Biopsy: General Concepts. *Acta Cytol*,  
714 63(6), 449-455. doi:10.1159/000499337
- 715 Riva, F., Bidard, F. C., Houy, A., Saliou, A., Madic, J., Rampanou, A., . . . Pierga, J. Y.  
716 (2017). Patient-Specific Circulating Tumor DNA Detection during Neoadjuvant  
717 Chemotherapy in Triple-Negative Breast Cancer. *Clin Chem*, 63(3), 691-699.  
718 doi:10.1373/clinchem.2016.262337
- 719 Rong, G., Yi, Z., Ma, F., Guan, Y., Xu, Y., Li, L., & Xu, B. (2020). Mutational  
720 characteristics determined using circulating tumor DNA analysis in triple-  
721 negative breast cancer patients with distant metastasis. *Cancer Commun (Lond)*,  
722 40(12), 738-742. doi:10.1002/cac2.12102
- 723 Sato, K., & Akimoto, K. (2017). Expression Levels of KMT2C and SLC20A1  
724 Identified by Information-theoretical Analysis Are Powerful Prognostic  
725 Biomarkers in Estrogen Receptor-positive Breast Cancer. *Clin Breast Cancer*,  
726 17(3), e135-e142. doi:10.1016/j.clbc.2016.11.005
- 727 Seregni, E., Coli, A., & Mazzucca, N. (2004). Circulating tumour markers in breast  
728 cancer. *Eur J Nucl Med Mol Imaging*, 31 Suppl 1, S15-22. doi:10.1007/s00259-  
729 004-1523-z

- 730 Stover, D. G., Parsons, H. A., Ha, G., Freeman, S. S., Barry, W. T., Guo, H., . . .  
731 Adalsteinsson, V. A. (2018). Association of Cell-Free DNA Tumor Fraction and  
732 Somatic Copy Number Alterations With Survival in Metastatic Triple-Negative  
733 Breast Cancer. *J Clin Oncol*, 36(6), 543-553. doi:10.1200/jco.2017.76.0033
- 734 Sung, H., Ferlay, J., Siegel, R. L., Laversanne, M., Soerjomataram, I., Jemal, A., & Bray,  
735 F. (2021). Global Cancer Statistics 2020: GLOBOCAN Estimates of Incidence  
736 and Mortality Worldwide for 36 Cancers in 185 Countries. *CA Cancer J Clin*,  
737 71(3), 209-249. doi:10.3322/caac.21660
- 738 Swarup, V., & Rajeswari, M. R. (2007). Circulating (cell-free) nucleic acids--a  
739 promising, non-invasive tool for early detection of several human diseases.  
740 *FEBS Lett*, 581(5), 795-799. doi:10.1016/j.febslet.2007.01.051
- 741 Vandekerkhove, G., Todenhöfer, T., Annala, M., Struss, W. J., Wong, A., Beja, K., . . .  
742 Wyatt, A. W. (2017). Circulating Tumor DNA Reveals Clinically Actionable  
743 Somatic Genome of Metastatic Bladder Cancer. *Clin Cancer Res*, 23(21), 6487-  
744 6497. doi:10.1158/1078-0432.Ccr-17-1140
- 745 Wang, Y., Lin, L., Li, L., Wen, J., Chi, Y., Hao, R., . . . Wang, O. (2021). Genetic  
746 landscape of breast cancer and mutation tracking with circulating tumor DNA  
747 in Chinese women. *Aging (Albany NY)*, 13(8), 11860-11876.  
748 doi:10.18632/aging.202888
- 749 Weber, Z. T., Collier, K. A., Tallman, D., Forman, J., Shukla, S., Asad, S., . . . Stover,  
750 D. G. (2021). Modeling clonal structure over narrow time frames via circulating  
751 tumor DNA in metastatic breast cancer. *Genome Med*, 13(1), 89.  
752 doi:10.1186/s13073-021-00895-x
- 753 Wongchenko, M. J., Kim, S. B., Saura, C., Oliveira, M., Lipson, D., Kennedy, M., . . .  
754 Dent, R. (2020). Circulating Tumor DNA and Biomarker Analyses From the  
755 LOTUS Randomized Trial of First-Line Ipatasertib and Paclitaxel for  
756 Metastatic Triple-Negative Breast Cancer. *JCO Precis Oncol*, 4, 1012-1024.  
757 doi:10.1200/po.19.00396
- 758 Yang, L., Perez, A. A., Fujie, S., Warden, C., Li, J., Wang, Y., . . . Yen, Y. (2014). Wnt  
759 modulates MCL1 to control cell survival in triple negative breast cancer. *BMC*

760 Cancer, 14, 124. doi:10.1186/1471-2407-14-124

761 Zhang, J., Hou, S., You, Z., Li, G., Xu, S., Li, X., . . . Pang, D. (2021). Expression and  
762 prognostic values of ARID family members in breast cancer. *Aging (Albany*  
763 *NY)*, 13(4), 5621-5637. doi:10.18632/aging.202489

764 Zhang, Y. J., Wei, L., Liu, M., Li, J., Zheng, Y. Q., Gao, Y., & Li, X. R. (2013). BTG2  
765 inhibits the proliferation, invasion, and apoptosis of MDA-MB-231 triple-  
766 negative breast cancer cells. *Tumour Biol*, 34(3), 1605-1613.  
767 doi:10.1007/s13277-013-0691-5

768 Zhu, R., Yang, G., Cao, Z., Shen, K., Zheng, L., Xiao, J., . . . Zhang, T. (2020). The  
769 prospect of serum and glucocorticoid-inducible kinase 1 (SGK1) in cancer  
770 therapy: a rising star. *Ther Adv Med Oncol*, 12, 1758835920940946.  
771 doi:10.1177/1758835920940946

772

773

774

775

776

777

778

779

780

781

782

783

784

785

786

787

788

789

790 Supplement table 1. The list of 457 genes detected in this study.

|          |        |         |        |                 |         |          |          |         |         |          |
|----------|--------|---------|--------|-----------------|---------|----------|----------|---------|---------|----------|
| ABL1     | BRCA1  | CDKN2C  | ERBB3  | GABRA6          | IRF4    | MAPK8IP1 | NOTCH4   | POLE    | RPA3    | TEK      |
| ACVR1B   | BRCA2  | CEBPA   | ERBB4  | GAGE1           | IRS2    | MCL1     | NPM1     | POLQ    | RPL22   | TENT5C   |
| ACVR2A   | BRD4   | CHEK1   | ERCC2  | GALNT12         | ITK     | MDM2     | NRAS     | PPARG   | RPL5    | TET1     |
| AJUBA    | BRIP1  | CHEK2   | ERCC3  | GATA1           | JAK1    | MDM4     | NRG1     | PPM1D   | RPTOR   | TET2     |
| AKT1     | BTG1   | CIC     | ERCC4  | GATA2           | JAK2    | MECOM    | NSD1     | PPP2R1A | RUNX1   | TGFB1    |
| AKT2     | BTG2   | CREBBP  | ERCC5  | GATA3           | JAK3    | MED12    | NSD2     | PPP2R2A | SDHA    | TGFBR2   |
| AKT3     | BTK    | CRIPAK  | ERG    | GATA4           | JUN     | MEF2B    | NSD3     | PRDM1   | SDHB    | TIPARP   |
| ALK      | BTLA   | CRKL    | ERRFI1 | GATA6           | KDM5A   | MEN1     | NT5C2    | PRF1    | SDHC    | TLR4     |
| ALOX12B  | EMSY   | CSF1R   | ESR1   | GID4 (C17orf39) | KDM5C   | MERTK    | NT5E     | PRKAR1A | SDHD    | TNF      |
| AMER1    | CALR   | CSF3R   | ETV1   | GNA11           | KDM6A   | MET      | NTRK1    | PRKCI   | SETBP1  | TNFAIP3  |
| APC      | CARD11 | CTAG2   | EZH2   | GNA13           | KDR     | MGMT     | NTRK2    | PRX     | SETD2   | TNFRSF14 |
| AR       | CASP8  | CTCF    | FANCA  | GNAQ            | KEAP1   | MITF     | NTRK3    | PTCH1   | SF3B1   | TNFRSF18 |
| ARAF     | CBFB   | CTLA4   | FANCC  | GNAS            | KEL     | MKNK1    | P2RY8    | PTEN    | SGK1    | TNFRSF4  |
| ARFRP1   | CBL    | CTNNA1  | FANCG  | GREM1           | KIT     | MLH1     | PALB2    | PTK6    | SH2D1A  | TNFSF11  |
| ARHGAP35 | CCND1  | CTNNB1  | FANCL  | GRM3            | KITLG   | MLH3     | PRKN     | PTPN11  | SIK1    | TNFSF14  |
| ARHGEF12 | CCND2  | CUL3    | FANCM  | GSK3B           | KLHL6   | MPL      | PARP1    | PTPRD   | SIN3A   | TNFSF18  |
| ARID1A   | CCND3  | CUL4A   | FAS    | H3F3A           | KMT2A   | MRE11    | PARP2    | PTPRK   | SLAMF7  | TNFSF4   |
| ARID2    | CCNE1  | CXCR4   | FBXW7  | H3F3C           | KMT2B   | MSH2     | PARP3    | PTPRO   | SMAD2   | TOP1     |
| ARID5B   | CD160  | CYP17A1 | FGF10  | HAVCR2          | KMT2C   | MSH3     | PAX5     | PTPRT   | SMAD4   | TP53     |
| ASXL1    | CD22   | DAXX    | FGF12  | HDAC1           | KMT2D   | MSH6     | PBRM1    | QKI     | SMARCA4 | TSC1     |
| ATM      | CD244  | DDR1    | FGF14  | HDAC2           | KRAS    | MST1R    | PCBP1    | RAC1    | SMARCB1 | TSC2     |
| ATR      | CD274  | DDR2    | FGF19  | HDAC3           | LAG3    | MTAP     | PCNA     | RAD21   | SMC1A   | TSHR     |
| ATRX     | CD276  | DICER1  | FGF23  | HDAC6           | LCK     | MTOR     | PDCD1    | RAD50   | SMC3    | TSHZ2    |
| AURKA    | CD28   | DIS3    | FGF3   | HGF             | LEF1    | MUTYH    | PDCD1LG2 | RAD51   | SMO     | TSHZ3    |
| AURKB    | CD38   | DNMT3A  | FGF4   | HIST1H1C        | LIFR    | MYC      | PDGFRA   | RAD51B  | SNCAIP  | TYRO3    |
| AXIN1    | CD48   | DOT1L   | FGF6   | HIST1H2BD       | LIMK1   | MYCL     | PDGFRB   | RAD51C  | SOCS1   | U2AF1    |
| AXIN2    | CD69   | EED     | FGFR1  | HNF1A           | LRRK2   | MYCN     | PKD1     | RAD51D  | SOX17   | USP9X    |
| AXL      | CD70   | EGFR    | FGFR2  | HRAS            | LTK     | MYD88    | PHF6     | RAD52   | SOX2    | VEGFA    |
| B2M      | CD79A  | EGR3    | FGFR3  | HSD3B1          | LYN     | NAV3     | PHOX2B   | RAD54L  | SOX9    | VEGFB    |
| B4GALT3  | CD79B  | EIF4A2  | FGFR4  | ICOS            | MAF     | NBN      | PIGF     | RAF1    | SPATA2  | VEZF1    |
| BAGE     | CD80   | ELF3    | FH     | ICOSLG          | MAGEA1  | NCOA4    | PIK3C2B  | RARA    | SPEN    | VHL      |
| BAP1     | CD86   | EOMES   | FLCN   | ID3             | MAGEA12 | NCOR1    | PIK3C2G  | RB1     | SPOP    | VTCN1    |
| BARD1    | CDC73  | EP300   | FLT1   | IDH1            | MAGEA3  | NEK11    | PIK3CA   | RBM10   | SRC     | WT1      |
| BCL2     | CDH1   | EPCAM   | FLT3   | IDH2            | MAGEA4  | NF1      | PIK3CB   | RECQL   | STAG2   | XPO1     |
| BCL2L1   | CDK12  | EPHA1   | FLT4   | IGF1R           | MAGEC2  | NF2      | PIK3CD   | RECQL4  | STAT3   | XRCC2    |
| BCL2L2   | CDK4   | EPHA2   | FOXA1  | IGF2            | MAP2K1  | NFE2L2   | PIK3CG   | REL     | STK11   | ZNF217   |
| BCL6     | CDK6   | EPHA3   | FOXA2  | IKBKE           | MAP2K2  | NFE2L3   | PIK3R1   | RET     | SUFU    | ZNF703   |
| BCOR     | CDK8   | EPHB1   | FOXL2  | IKZF1           | MAP2K4  | NFKBIA   | PIK3R2   | RICTOR  | SYK     |          |
| BCORL1   | CDKN1A | EPHB4   | FOXO3  | IL7R            | MAP3K1  | NKX2-1   | PIM1     | RNF43   | TAF1    |          |
| BLM      | CDKN1B | EPHB6   | FOXP1  | INPP4B          | MAP3K13 | NOTCH1   | PMS1     | ROS1    | TAS2R38 |          |
| BMPR1A   | CDKN2A | EPPK1   | FRK    | INSR            | MAPK1   | NOTCH2   | PMS2     | RPA1    | TBL1XR1 |          |
| BRAF     | CDKN2B | ERBB2   | FUBP1  | IRF2            | MAPK11  | NOTCH3   | POLD1    | RPA2    | TBX3    |          |



## Supplementary Figure 1

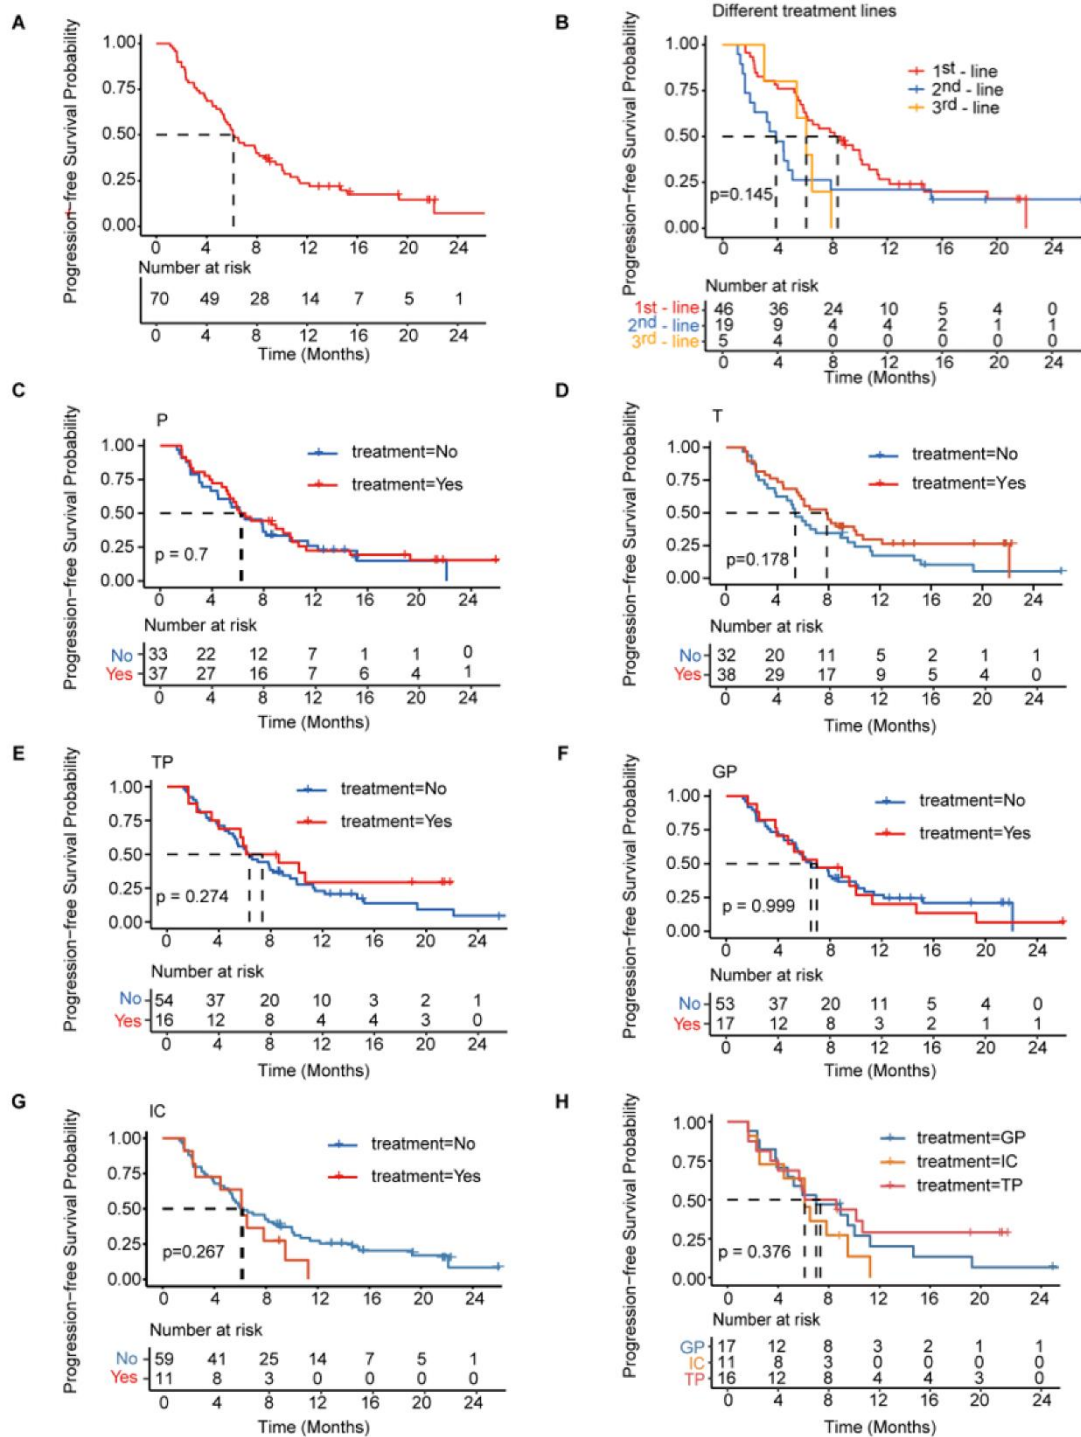

791

792

793

794

795

796

797

798

**Supplementary Figure 1.** (A) Kaplan–Meier analysis of PFS in all patients with mTNBC. (B) Kaplan–Meier analysis of PFS in patients with different lines of treatment. (C–H) Kaplan–Meier analysis of PFS in patients treated with distinct treatment regimens. GP, gemcitabine- and platinum-based treatment; IC, immunotherapy plus chemotherapy; mTNBC, metastatic triple-negative breast cancer; P, platinum-based treatment; PFS, progression-free survival; T, taxane-based treatment; TP, taxane- and platinum-based treatment. A  $P$ -value  $< 0.05$  was used as a measure of statistical significance.

## Supplementary Figure 2

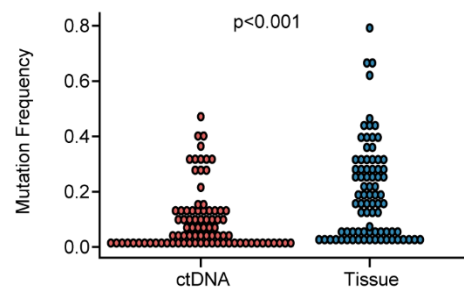

799

800 **Supplementary Figure 2. Comparison of mutation frequency between ctDNA and tissue.** The mutation  
801 frequency in ctDNA was significantly lower than that in tissues ( $P < 0.001$ ). ctDNA, circulating tumor DNA. A  $P$ -  
802 value  $< 0.05$  was used as a measure of statistical significance.

### Supplementary Figure 3

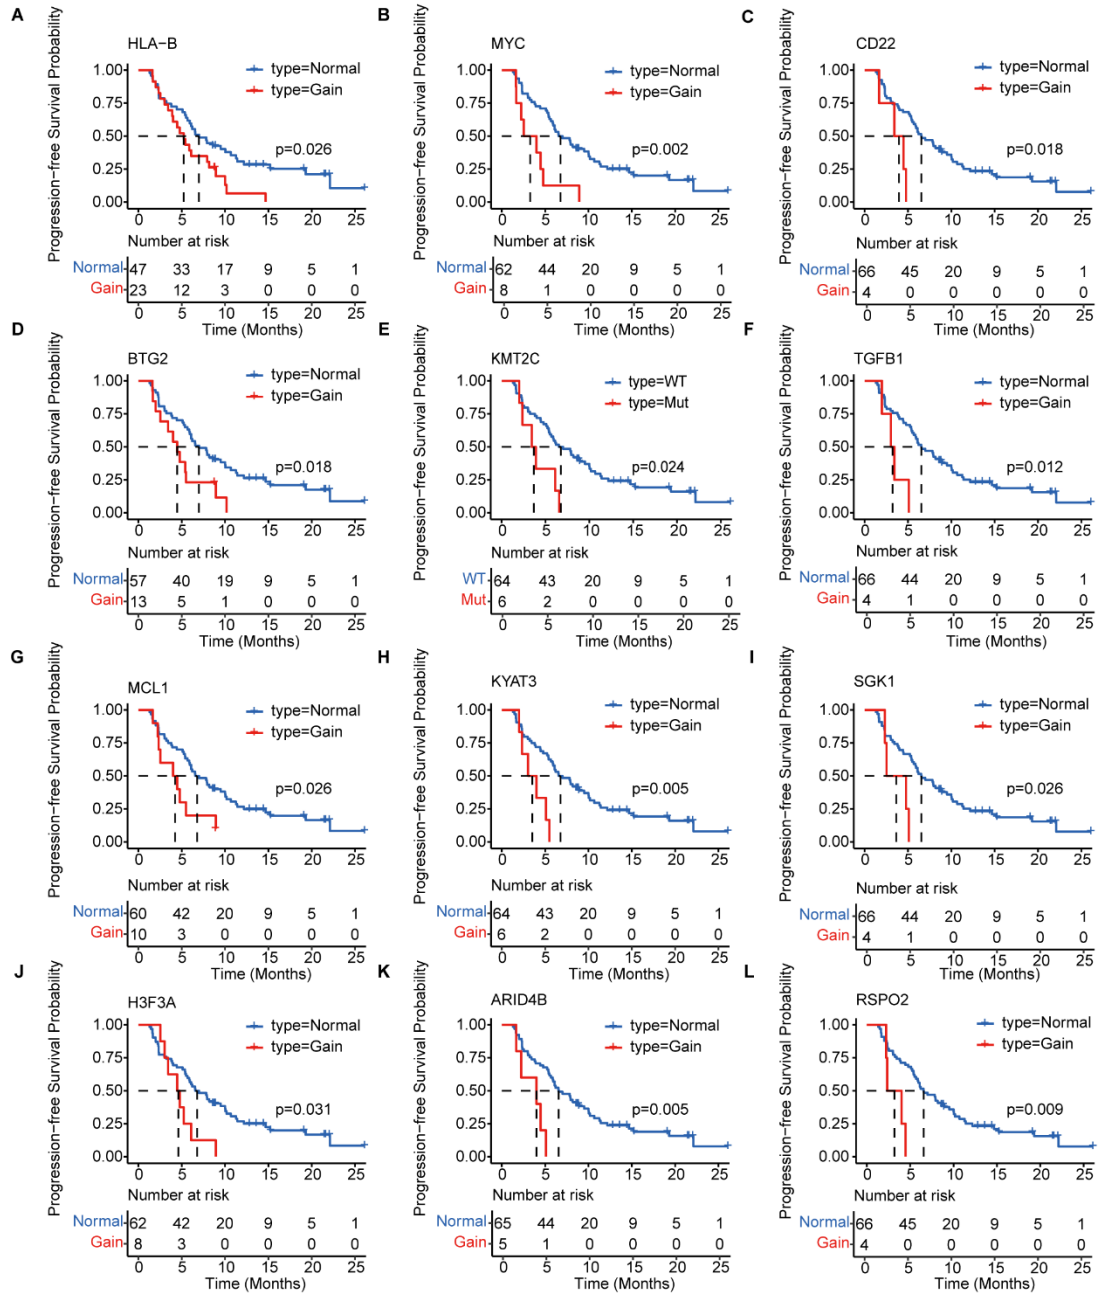

803

804

805

806

807

808

**Supplementary Figure 3. Kaplan–Meier analysis of the PFS of 12 prognosis-relevant mutated genes in patients with mTNBC.** Patients with mutated *HLA-B* (A), *MYC* (B), *CD22* (C), *BTG2* (D), *KMT2C* (E), *TGFB1* (F), *MCL1* (G), *KYAT3* (H), *SGK1* (I), *H3F3A* (J), *ARID4B* (K), or *RSPO2* (L) had a significantly shorter PFS. Gain = copy number gain; mTNBC, metastatic triple-negative breast cancer patients; Mut, mutated; PFS, progression-free survival. WT, wild type. A  $P$ -value  $< 0.05$  was used as a measure of statistical significance.
